# Supplementary material for: Integrated multi-omics analysis identifies novel risk loci for amyotrophic lateral sclerosis in the Chinese population
Source: Research Square preprint supplement (doi:10.21203/rs.3.rs-3967132/v1), 2024-03-05
Supplement: Supplementary file 1 [file 43b1eaf86d075f366ce3fa56.xlsx]

## Sheet: go_2710all
	ONTOLOGY	ID	Description	GeneRatio		Ratio	BgRatio	pvalue	p.adjust	geneID	Count
GO:0016358	BP	GO:0016358	dendrite development	34	1244	0.0273312	234/18614	1.55e-05	0.0286364	50807/54149/22849/114788/1630/26052/84062/2146/79791/2861/23072/3688/57498/57626/120892/4139/4776/8301/8499/5530/5592/5728/5789/5911/9693/5649/10371/26037/91137/6801/26115/23043/7337/8976	34
GO:0007411	BP	GO:0007411	axon guidance	33	1244	0.0265273	225/18614	1.69e-05	0.0286364	214/64919/627/10752/1123/53942/27255/1630/1946/55740/2042/285220/23767/3799/56956/8543/23077/91624/4781/4897/9378/9369/5649/6091/6092/10371/10512/9723/57715/9353/7204/123016/23032	33
GO:0097485	BP	GO:0097485	neuron projection guidance	33	1244	0.0265273	225/18614	1.69e-05	0.0286364	214/64919/627/10752/1123/53942/27255/1630/1946/55740/2042/285220/23767/3799/56956/8543/23077/91624/4781/4897/9378/9369/5649/6091/6092/10371/10512/9723/57715/9353/7204/123016/23032	33
GO:0071559	BP	GO:0071559	response to transforming growth factor beta	38	1244	0.0305466	280/18614	2.45e-05	0.0286364	6868/8754/5926/51742/858/9076/1281/4921/2201/2530/54756/3621/3694/23592/4052/6885/407029/407030/2660/51701/2908/23089/5494/5796/64750/6660/55553/161742/7048/7049/51592/79674/7525/6935/9839/463/9372/26036	38
GO:0050803	BP	GO:0050803	regulation of synapse structure or activity	34	1244	0.0273312	240/18614	2.65e-05	0.0286364	50807/627/1499/26052/84062/1946/54583/23767/2895/9456/3688/145581/120892/54674/1432/407030/4593/23077/4763/4776/4897/9378/8499/5728/5789/5911/5649/6092/26037/57084/23657/26115/7337/8976	34
GO:0071560	BP	GO:0071560	cellular response to transforming growth factor beta stimulus	37	1244	0.0297428	274/18614	3.47e-05	0.0292968	6868/8754/5926/51742/858/9076/1281/4921/2201/2530/54756/3621/3694/23592/4052/6885/407029/407030/2660/51701/2908/23089/5494/5796/64750/6660/55553/161742/7048/7049/51592/79674/7525/6935/9839/9372/26036	37
GO:0050807	BP	GO:0050807	regulation of synapse organization	33	1244	0.0265273	234/18614	3.79e-05	0.0292968	50807/627/1499/26052/84062/1946/54583/23767/2895/9456/3688/145581/120892/54674/1432/407030/4593/23077/4763/4776/4897/9378/8499/5728/5789/5911/5649/6092/26037/23657/26115/7337/8976	33
GO:0035249	BP	GO:0035249	synaptic transmission, glutamatergic	20	1244	0.0160772	112/18614	4.8e-05	0.0324488	84896/1182/1268/84062/2895/2903/2913/2917/2918/348980/9456/120892/63908/4763/2908/9378/5649/57084/6857/51542	20
GO:0007179	BP	GO:0007179	transforming growth factor beta receptor signaling pathway	31	1244	0.0249196	218/18614	5.49e-05	0.0329697	6868/8754/5926/51742/858/1281/2201/2530/54756/3621/3694/23592/4052/6885/407029/407030/2660/51701/23089/5494/5796/64750/161742/7048/7049/51592/79674/6935/9839/9372/26036	31
GO:0010975	BP	GO:0010975	regulation of neuron projection development	52	1244	0.0418006	452/18614	8.98e-05	0.0485472	51761/627/55704/1123/1268/114788/1630/4921/26052/84062/1946/2042/2146/79791/2895/23072/3655/23028/57498/120892/4139/4155/4593/23077/4776/4897/8499/5530/5728/5789/5906/5911/9693/5649/6049/6091/6092/57142/22902/10371/10512/9723/57715/26037/9353/26115/55754/23043/5756/7337/54986/10090	52
GO:0097060	CC	GO:0097060	synaptic membrane	51	1273	0.0400628	390/19518	1.62e-06	0.000998727	287/84896/490/1008/1007/1129/1182/1268/53942/27255/85445/1499/1630/1740/26052/84062/2066/23085/23767/2557/2567/2743/10243/2895/2903/2913/2917/348980/3688/3751/3760/386617/55327/145581/4593/81832/4897/9378/27253/8301/5789/5911/22999/9699/7779/6546/9627/6801/23345/6857/7402	51
GO:0098978	CC	GO:0098978	glutamatergic synapse	49	1273	0.0384918	410/19518	3.01e-05	0.00929354	50807/84896/490/93664/814/1008/1129/1182/1268/1499/8452/26052/84062/8411/54583/2059/2066/23767/8087/2895/2903/2913/348980/9456/3688/3751/55327/145581/120892/1432/63908/81832/4763/4897/10718/27253/27445/54477/5530/5789/5906/5908/57142/23012/6857/23043/7204/7337/8976	49
GO:0045211	CC	GO:0045211	postsynaptic membrane	36	1273	0.0282797	277/19518	6.04e-05	0.0108899	287/84896/1008/1007/1129/1182/1499/1630/1740/26052/84062/2066/23767/2557/2567/2743/10243/2895/2903/2913/2917/348980/3751/386617/55327/145581/4593/81832/4897/27253/8301/7779/6546/6801/23345/7402	36
GO:0000145	CC	GO:0000145	exocyst	6	1273	0.00471328	13/19518	8.76e-05	0.0108899	55770/60412/10640/54536/23233/25924	6
GO:0098984	CC	GO:0098984	neuron to neuron synapse	45	1273	0.0353496	382/19518	8.81e-05	0.0108899	56899/796/1129/22849/1499/1630/1740/26052/84062/54583/3646/2059/2066/23767/8087/57120/10243/2895/2903/2913/2917/9456/3688/3751/55327/145581/57534/81832/4897/27445/5142/9867/54477/55607/5728/5789/6156/57142/26037/7779/6546/6801/134957/6857/23043	45
GO:0000151	CC	GO:0000151	ubiquitin ligase complex	38	1273	0.0298507	307/19518	0.000109293	0.0112571	54467/25852/51666/648/79872/150684/8454/8453/8452/55827/23142/8445/222235/64839/26224/26235/26234/80204/79791/26272/23291/55294/56929/2861/84541/54442/55975/4008/4289/10048/9781/6045/64750/7324/130507/23032/55031/11059	38
GO:0042734	CC	GO:0042734	presynaptic membrane	24	1273	0.0188531	164/19518	0.000164433	0.0145171	490/1008/1007/1129/1268/53942/27255/85445/1499/2066/23085/2903/2913/348980/3760/386617/9378/27253/8301/5789/22999/9699/9627/6857	24
GO:0032279	CC	GO:0032279	asymmetric synapse	41	1273	0.0322074	353/19518	0.000240589	0.0185855	56899/1129/22849/1499/1630/1740/26052/84062/54583/3646/2059/2066/23767/8087/57120/10243/2895/2903/2913/2917/9456/3688/3751/55327/145581/57534/81832/4897/27445/5142/9867/54477/55607/5728/6156/57142/26037/7779/6546/6801/23043	41
GO:0099572	CC	GO:0099572	postsynaptic specialization	41	1273	0.0322074	364/19518	0.000455183	0.0312559	56899/1008/22849/1499/1630/1740/26052/84062/54583/3646/2059/2066/23767/8087/2557/2743/57120/10243/2895/2903/2913/9456/3751/55327/145581/57534/81832/4897/27445/5142/9867/54477/55607/5728/6156/57142/26037/7779/6546/6801/23043	41
GO:0000118	CC	GO:0000118	histone deacetylase complex	14	1273	0.0109976	79/19518	0.000536867	0.0331784	5926/51742/57634/54815/9759/9734/3621/54556/221037/9611/51317/55758/23314/79718	14
GO:0019005	CC	GO:0019005	SCF ubiquitin ligase complex	12	1273	0.00942655	63/19518	0.000673929	0.0354324	8454/8453/222235/64839/26224/26235/26234/79791/26272/23291/55294/55031	12
GO:0005819	CC	GO:0005819	spindle	45	1273	0.0353496	421/19518	0.000763979	0.0354324	259266/472/57448/8556/8317/9859/9857/9793/23122/1452/79848/1499/8452/51164/6993/27436/79441/253012/3174/27130/84056/84541/9585/4085/79884/1432/57509/4627/9611/121441/140609/2908/23035/7803/5885/5925/9126/6683/166378/79718/10844/10426/9525/55055/26009	45
GO:0014069	CC	GO:0014069	postsynaptic density	38	1273	0.0298507	339/19518	0.000790902	0.0354324	56899/22849/1499/1630/1740/26052/84062/54583/3646/2059/2066/23767/8087/57120/10243/2895/2903/2913/9456/3751/55327/145581/57534/81832/4897/27445/5142/9867/54477/55607/5728/6156/57142/26037/7779/6546/6801/23043	38
GO:0031252	CC	GO:0031252	cell leading edge	45	1273	0.0353496	422/19518	0.000802676	0.0354324	23527/6868/54518/323/490/526/54828/55704/23607/8476/9578/23122/1182/29119/1499/10395/667/55740/23136/2059/2195/2557/2567/3688/8543/4289/66036/4627/4651/4646/26986/90102/51196/5796/5921/5962/6092/22902/54212/6870/5756/7399/55591/8936/8976	45
GO:0099023	CC	GO:0099023	vesicle tethering complex	11	1273	0.00864101	57/19518	0.000996099	0.0410393	10466/57511/55770/60412/10640/54536/23233/25924/51594/27072/51542	11
GO:0030165	MF	GO:0030165	PDZ domain binding	17	1227	0.0138549	83/18369	2.84e-05	0.0254431	92/6868/490/1080/1182/1525/80319/9732/23085/60412/2861/2895/57498/5728/9693/54221/7049	17
GO:0004721	MF	GO:0004721	phosphoprotein phosphatase activity	26	1227	0.0211899	168/18369	5.07e-05	0.0254431	8556/11221/11266/142679/2138/2070/9108/4626/23035/5494/5495/151742/5530/5728/7803/8073/5782/5775/5788/5789/5796/374462/5803/8732/85464/134510	26
GO:0004725	MF	GO:0004725	protein tyrosine phosphatase activity	17	1227	0.0138549	91/18369	9.66e-05	0.0271044	11221/11266/142679/2138/2070/9108/5728/7803/8073/5782/5775/5788/5789/5796/374462/5803/85464	17
GO:0019787	MF	GO:0019787	ubiquitin-like protein transferase activity	53	1227	0.0431948	467/18369	0.000107986	0.0271044	54467/51666/57448/79872/55749/8453/8452/9666/26224/26234/80204/26272/23291/55632/57531/9759/25831/23072/26091/55008/6596/4008/57534/23077/197370/286053/8554/9867/5903/7844/11342/51444/9781/57484/221687/6045/6049/64750/51592/55521/135644/391712/9320/7324/10477/51465/7337/9690/130507/151525/11059/80829/26036	53
GO:0042578	MF	GO:0042578	phosphoric ester hydrolase activity	42	1227	0.0342298	352/18369	0.000186504	0.0374499	8556/11221/11266/142679/2138/2070/3612/8821/9108/4626/22978/221294/10846/50940/5142/5144/8654/23035/200576/5332/51196/23007/89869/5337/5494/5495/151742/5530/5728/7803/8073/5782/5775/5788/5789/5796/374462/5803/8732/85464/93492/134510	42
GO:0030551	MF	GO:0030551	cyclic nucleotide binding	9	1227	0.00733496	33/18369	0.000229259	0.0383628	1259/348980/10846/50940/5142/5144/8654/5592/9693	9
