# Supplementary material for: Integrated multi-omics analysis identifies novel risk loci for amyotrophic lateral sclerosis in the Chinese population
Source: Research Square preprint supplement (doi:10.21203/rs.3.rs-3967132/v1), 2024-03-05
Supplement: Supplementary file 2 [file 7f4037d431e3081b09c5d7db.xlsx]

## Sheet: sheet1
	ONTOLOGY	ID	Description	GeneRatio		Ratio	BgRatio	pvalue	p.adjust	geneID	Count	Group
GO:0016358	BP	GO:0016358	dendrite development	33	1150	0.0286957	234/18614	7.7254e-06	0.0135856	50807/54149/22849/114788/1630/26052/2146/79791/2861/23072/3688/57498/57626/120892/4139/4776/8301/8499/5530/5592/5728/5789/5911/9693/5649/10371/26037/91137/6801/26115/23043/7337/8976	33	hypermethylation
GO:0007411	BP	GO:0007411	axon guidance	32	1150	0.0278261	225/18614	8.84291e-06	0.0135856	214/64919/627/10752/1123/53942/27255/1630/1946/55740/2042/285220/23767/3799/8543/23077/91624/4781/4897/9378/9369/5649/6091/6092/10371/10512/9723/57715/9353/7204/123016/23032	32	hypermethylation
GO:0097485	BP	GO:0097485	neuron projection guidance	32	1150	0.0278261	225/18614	8.84291e-06	0.0135856	214/64919/627/10752/1123/53942/27255/1630/1946/55740/2042/285220/23767/3799/8543/23077/91624/4781/4897/9378/9369/5649/6091/6092/10371/10512/9723/57715/9353/7204/123016/23032	32	hypermethylation
GO:0071559	BP	GO:0071559	response to transforming growth factor beta	37	1150	0.0321739	280/18614	1.02186e-05	0.0135856	6868/8754/5926/51742/858/9076/1281/4921/2201/2530/54756/3621/3694/23592/4052/6885/407029/407030/2660/51701/2908/23089/5494/5796/64750/6660/55553/161742/7049/51592/79674/7525/6935/9839/463/9372/26036	37	hypermethylation
GO:0071560	BP	GO:0071560	cellular response to transforming growth factor beta stimulus	36	1150	0.0313043	274/18614	1.52171e-05	0.0161849	6868/8754/5926/51742/858/9076/1281/4921/2201/2530/54756/3621/3694/23592/4052/6885/407029/407030/2660/51701/2908/23089/5494/5796/64750/6660/55553/161742/7049/51592/79674/7525/6935/9839/9372/26036	36	hypermethylation
GO:0050807	BP	GO:0050807	regulation of synapse organization	32	1150	0.0278261	234/18614	1.99038e-05	0.0176414	50807/627/1499/26052/1946/54583/23767/2895/9456/3688/145581/120892/54674/1432/407030/4593/23077/4763/4776/4897/9378/8499/5728/5789/5911/5649/6092/26037/23657/26115/7337/8976	32	hypermethylation
GO:0006470	BP	GO:0006470	protein dephosphorylation	33	1150	0.0286957	249/18614	2.8462e-05	0.0195945	23141/8556/27071/10395/11221/11266/142679/2029/2138/23291/9108/57552/23035/5494/5495/151742/4659/100507444/5530/5728/7803/8073/5782/5775/5788/5789/5796/374462/5803/8732/57181/85464/134510	33	hypermethylation
GO:0007179	BP	GO:0007179	transforming growth factor beta receptor signaling pathway	30	1150	0.026087	218/18614	3.16812e-05	0.0195945	6868/8754/5926/51742/858/1281/2201/2530/54756/3621/3694/23592/4052/6885/407029/407030/2660/51701/23089/5494/5796/64750/161742/7049/51592/79674/6935/9839/9372/26036	30	hypermethylation
GO:0050803	BP	GO:0050803	regulation of synapse structure or activity	32	1150	0.0278261	240/18614	3.31611e-05	0.0195945	50807/627/1499/26052/1946/54583/23767/2895/9456/3688/145581/120892/54674/1432/407030/4593/23077/4763/4776/4897/9378/8499/5728/5789/5911/5649/6092/26037/23657/26115/7337/8976	32	hypermethylation
GO:0007409	BP	GO:0007409	axonogenesis	48	1150	0.0417391	427/18614	4.38436e-05	0.0224887	214/51062/51761/64919/627/10752/1123/53942/27255/1630/1946/55740/2042/285220/23767/3688/3799/8543/4155/23077/91624/4781/4897/9378/9369/56288/8301/5592/5728/5803/5649/6049/6091/6092/57142/22902/10371/10512/9723/57715/26037/91137/9353/6683/7204/123016/23032/10090	48	hypermethylation
GO:0010975	BP	GO:0010975	regulation of neuron projection development	50	1150	0.0434783	452/18614	4.65167e-05	0.0224887	51761/627/55704/1123/1268/114788/1630/4921/26052/1946/2042/2146/79791/2895/23072/3655/23028/57498/120892/4139/4155/4593/23077/4776/4897/8499/5530/5728/5789/5911/9693/5649/6049/6091/6092/57142/22902/10371/10512/9723/57715/26037/9353/26115/55754/23043/5756/7337/54986/10090	50	hypermethylation
GO:0031146	BP	GO:0031146	SCF-dependent proteasomal ubiquitin-dependent protein catabolic process	11	1150	0.00956522	46/18614	8.57667e-05	0.0375036	8454/8453/222235/64839/26224/26235/26234/79791/26272/23291/55294	11	hypermethylation
GO:0050808	BP	GO:0050808	synapse organization	50	1150	0.0434783	466/18614	0.000100721	0.0375036	323/50807/627/23607/1008/1007/53942/1282/1499/26052/1946/54583/2066/23085/23767/2743/10243/2895/9456/3688/145581/120892/54674/1432/407030/4593/23077/4763/4776/4774/4897/10718/9378/27253/27445/8499/5728/5789/5908/5911/5649/6092/9723/26037/91137/23657/26115/7337/8936/8976	50	hypermethylation
GO:0061564	BP	GO:0061564	axon development	51	1150	0.0443478	479/18614	0.000104668	0.0375036	214/51062/51761/64919/627/10752/1123/1268/53942/27255/1630/1946/55740/2042/285220/23767/2917/3688/3799/8543/4155/23077/91624/4781/4897/9378/9369/56288/8301/5592/5728/5803/5649/6049/6091/6092/57142/22902/10371/10512/9723/57715/26037/91137/9353/6683/27242/7204/123016/23032/10090	51	hypermethylation
GO:0050919	BP	GO:0050919	negative chemotaxis	11	1150	0.00956522	47/18614	0.000105783	0.0375036	1946/23767/3084/10718/6091/6092/10371/10512/9723/57715/9353	11	hypermethylation
GO:0048813	BP	GO:0048813	dendrite morphogenesis	21	1150	0.0182609	140/18614	0.000138696	0.0460991	26052/79791/23072/3688/57498/120892/4776/8301/8499/5530/5728/5789/5911/9693/5649/10371/26037/26115/23043/7337/8976	21	hypermethylation
GO:0099560	BP	GO:0099560	synaptic membrane adhesion	8	1150	0.00695652	27/18614	0.000159737	0.0499694	1008/1007/1946/23767/145581/1432/27253/5789	8	hypermethylation
GO:0097060	CC	GO:0097060	synaptic membrane	49	1170	0.0418803	390/19518	7.52238e-07	0.000459617	287/84896/490/1008/1007/1129/1182/1268/53942/27255/85445/1499/1630/1740/26052/2066/23085/23767/2557/2567/2743/10243/2895/2903/2913/2917/3688/3751/3760/386617/55327/145581/4593/81832/4897/9378/27253/8301/5789/5911/22999/9699/7779/6546/9627/6801/23345/6857/7402	49	hypermethylation
GO:0098984	CC	GO:0098984	neuron to neuron synapse	44	1170	0.0376068	382/19518	2.51042e-05	0.00766934	56899/796/1129/22849/1499/1630/1740/26052/54583/3646/2059/2066/23767/8087/57120/10243/2895/2903/2913/2917/9456/3688/3751/55327/145581/57534/81832/4897/27445/5142/9867/54477/55607/5728/5789/6156/57142/26037/7779/6546/6801/134957/6857/23043	44	hypermethylation
GO:0000145	CC	GO:0000145	exocyst	6	1170	0.00512821	13/19518	5.45448e-05	0.0088474	55770/60412/10640/54536/23233/25924	6	hypermethylation
GO:0045211	CC	GO:0045211	postsynaptic membrane	34	1170	0.0290598	277/19518	5.79208e-05	0.0088474	287/84896/1008/1007/1129/1182/1499/1630/1740/26052/2066/23767/2557/2567/2743/10243/2895/2903/2913/2917/3751/386617/55327/145581/4593/81832/4897/27253/8301/7779/6546/6801/23345/7402	34	hypermethylation
GO:0032279	CC	GO:0032279	asymmetric synapse	40	1170	0.034188	353/19518	8.28027e-05	0.00939798	56899/1129/22849/1499/1630/1740/26052/54583/3646/2059/2066/23767/8087/57120/10243/2895/2903/2913/2917/9456/3688/3751/55327/145581/57534/81832/4897/27445/5142/9867/54477/55607/5728/6156/57142/26037/7779/6546/6801/23043	40	hypermethylation
GO:0000151	CC	GO:0000151	ubiquitin ligase complex	36	1170	0.0307692	307/19518	9.22879e-05	0.00939798	54467/25852/51666/648/79872/150684/8454/8453/8452/55827/23142/8445/222235/64839/26224/26235/26234/79791/26272/23291/55294/56929/2861/84541/55975/4008/4289/10048/9781/6045/64750/7324/130507/23032/55031/11059	36	hypermethylation
GO:0042734	CC	GO:0042734	presynaptic membrane	23	1170	0.0196581	164/19518	0.000123819	0.0101613	490/1008/1007/1129/1268/53942/27255/85445/1499/2066/23085/2903/2913/3760/386617/9378/27253/8301/5789/22999/9699/9627/6857	23	hypermethylation
GO:0098978	CC	GO:0098978	glutamatergic synapse	44	1170	0.0376068	410/19518	0.000133045	0.0101613	50807/84896/490/93664/814/1008/1129/1182/1268/1499/8452/26052/8411/54583/2059/2066/23767/8087/2895/2903/2913/9456/3688/3751/55327/145581/120892/1432/81832/4763/4897/10718/27253/27445/54477/5530/5789/5908/57142/6857/23043/7204/7337/8976	44	hypermethylation
GO:0099572	CC	GO:0099572	postsynaptic specialization	40	1170	0.034188	364/19518	0.000160456	0.0108932	56899/1008/22849/1499/1630/1740/26052/54583/3646/2059/2066/23767/8087/2557/2743/57120/10243/2895/2903/2913/9456/3751/55327/145581/57534/81832/4897/27445/5142/9867/54477/55607/5728/6156/57142/26037/7779/6546/6801/23043	40	hypermethylation
GO:0000118	CC	GO:0000118	histone deacetylase complex	14	1170	0.0119658	79/19518	0.000228333	0.0139512	5926/51742/57634/54815/9759/9734/3621/54556/221037/9611/51317/55758/23314/79718	14	hypermethylation
GO:0031252	CC	GO:0031252	cell leading edge	44	1170	0.0376068	422/19518	0.000253108	0.014059	23527/6868/54518/323/490/526/54828/55704/23607/8476/9578/23122/1182/29119/1499/10395/667/55740/23136/2059/2195/2557/2567/3688/8543/4289/66036/4627/4651/26986/90102/51196/5796/5921/5962/6092/22902/54212/6870/5756/7399/55591/8936/8976	44	hypermethylation
GO:0019005	CC	GO:0019005	SCF ubiquitin ligase complex	12	1170	0.0102564	63/19518	0.000315427	0.0149264	8454/8453/222235/64839/26224/26235/26234/79791/26272/23291/55294/55031	12	hypermethylation
GO:0014069	CC	GO:0014069	postsynaptic density	37	1170	0.0316239	339/19518	0.000317584	0.0149264	56899/22849/1499/1630/1740/26052/54583/3646/2059/2066/23767/8087/57120/10243/2895/2903/2913/9456/3751/55327/145581/57534/81832/4897/27445/5142/9867/54477/55607/5728/6156/57142/26037/7779/6546/6801/23043	37	hypermethylation
GO:0005819	CC	GO:0005819	spindle	43	1170	0.0367521	421/19518	0.000457857	0.0199822	259266/472/57448/8556/8317/9859/9857/9793/23122/1452/79848/1499/8452/51164/6993/27436/79441/253012/3174/27130/84056/84541/9585/79884/1432/4627/9611/121441/140609/2908/23035/7803/5885/5925/9126/6683/166378/79718/10844/10426/9525/55055/26009	43	hypermethylation
GO:0004721	MF	GO:0004721	phosphoprotein phosphatase activity	26	1131	0.0229885	168/18369	1.26147e-05	0.0123876	8556/11221/11266/142679/2138/2070/9108/4626/23035/5494/5495/151742/5530/5728/7803/8073/5782/5775/5788/5789/5796/374462/5803/8732/85464/134510	26	hypermethylation
GO:0004725	MF	GO:0004725	protein tyrosine phosphatase activity	17	1131	0.0150309	91/18369	3.50855e-05	0.0129726	11221/11266/142679/2138/2070/9108/5728/7803/8073/5782/5775/5788/5789/5796/374462/5803/85464	17	hypermethylation
GO:0030165	MF	GO:0030165	PDZ domain binding	16	1131	0.0141468	83/18369	3.96313e-05	0.0129726	92/6868/490/1080/1182/80319/9732/23085/60412/2861/2895/57498/5728/9693/54221/7049	16	hypermethylation
GO:0019787	MF	GO:0019787	ubiquitin-like protein transferase activity	50	1131	0.0442087	467/18369	9.74243e-05	0.0239177	54467/51666/57448/79872/55749/8453/8452/9666/26224/26234/26272/23291/55632/57531/9759/25831/23072/26091/6596/4008/57534/23077/197370/286053/8554/9867/5903/7844/11342/51444/9781/57484/221687/6045/6049/64750/51592/55521/391712/9320/7324/10477/51465/7337/9690/130507/151525/11059/80829/26036	50	hypermethylation
GO:0042578	MF	GO:0042578	phosphoric ester hydrolase activity	40	1131	0.0353669	352/18369	0.000136159	0.0267417	8556/11221/11266/142679/2138/2070/3612/8821/9108/4626/22978/10846/50940/5142/5144/8654/23035/200576/5332/51196/89869/5337/5494/5495/151742/5530/5728/7803/8073/5782/5775/5788/5789/5796/374462/5803/8732/85464/93492/134510	40	hypermethylation
GO:0017018	MF	GO:0017018	myosin phosphatase activity	14	1131	0.0123784	76/18369	0.000196698	0.0289899	8556/11221/11266/142679/2138/4626/23035/5494/5495/151742/5530/5728/85464/134510	14	hypermethylation
GO:0045499	MF	GO:0045499	chemorepellent activity	8	1131	0.00707339	28/18369	0.000206649	0.0289899	1946/23767/3084/10718/10371/10512/9723/57715	8	hypermethylation
GO:0046629	BP	GO:0046629	gamma-delta T cell activation	5	139	-0.0359712	26/18614	1.25255e-06	0.00320026	917/1525/2841/3821/5788	5	hypomethylation
GO:0035249	BP	GO:0035249	synaptic transmission, glutamatergic	7	139	-0.0503597	112/18614	2.09886e-05	0.026813	1182/84062/348980/63908/4763/57084/51542	7	hypomethylation
