# Supplementary material for: Integrated multi-omics analysis identifies novel risk loci for amyotrophic lateral sclerosis in the Chinese population
Source: Research Square preprint supplement (doi:10.21203/rs.3.rs-3967132/v1), 2024-03-05
Supplement: Supplementary file 3 [file caa7ea142bb201753548b3c1.xlsx]

## Sheet: Sheet1
External validation in NYGC cohort of DMPs identified by EWAS analysis with four predicted DNAm ages as a covariate
		λ	Mprobe (mgene)	overlap.genes_NYGC (p<0.05; p<1.71e-6)	N_GO terms (total/related neuron)
total	--	--	302,052 (19,165)	15,429 (7,728; 1,623)
Hannum	unadjusted	2.134	2,710 (1,520)	1,282 (477; 51)	31/15	dendrite development/axon guidance/neuron projection guidance/regulation of synapse structure or activity/regulation of synapse organization/synaptic transmission, glutamatergic/regulation of neuron projection development/synaptic membrane/glutamatergic synapse/postsynaptic membrane/neuron to neuron synapse/presynaptic membrane/asymmetric synapse/postsynaptic specialization/postsynaptic density
	corrected	1.002	51 (37)	33 (20; 6)	3/1	neuron apoptotic process
Horvath	unadjusted	2.619	924 (588)	496 (201,25)	2/0	——
	corrected	1.002	12 (12)	10 (8; 4)	0/0	——
Horvath2	unadjusted	1.719	866 (545)	544 (207; 21)	1/1	presynaptic cytoskeleton
	corrected	1.001	36 (27)	25 (18; 7)	0/0	——
Levine	unadjusted	1.879	4,055 (2128)	1773 (662; 72)	18/10	regulation of synapse structure or activity/synapse organization/regulation of synapse organization/regulation of postsynapse organization/synaptic transmission, glutamatergic/axon guidance/neuron projection guidance/dendrite development/dendrite morphogenesis/postsynapse organization
	corrected	1.001	564 (368)	313 (120; 13)	5/4	presynaptic cytoskeleton presynaptic active zone cytoplasmic component synaptic membrane presynaptic membrane
