# Supplementary material for: Integrated multi-omics analysis identifies novel risk loci for amyotrophic lateral sclerosis in the Chinese population
Source: Research Square preprint supplement (doi:10.21203/rs.3.rs-3967132/v1), 2024-03-05
Supplement: Supplementary file 4 [file d8f44709b2e6b11aad4deaec.xlsx]

## Sheet: before GC correction
		Hannum	Horvath	Horvath2	Levine
	gene1	ANKLE2	ANKLE2	ANKLE2	ANKLE2
	gene2	SSH2	SSH2	SSH2	SSH2
	gene3
	gene4	TNFRSF21	TNFRSF21	CDC42BPB	TNFRSF21
	gene5	CDC42BPB	CDC42BPB	TNFRSF21	CDC42BPB
	gene6	ADAMTS9	ADAMTS9	LOC100130581	LOC100130581
	gene7	LOC100130581	LOC100130581	ADAMTS9	ADAMTS9
	gene8	ARID5A	CLEC14A	ARID5A	ARID5A
	gene9	PTPRN	ARID5A	PTPRN	PTPRN
	gene10	ELAVL3	PTPRN	JAG2	ELAVL3
	gene11	CLEC14A	ELAVL3	ELAVL3	JAG2
	gene12	JAG2	JAG2	CLEC14A	RNLS
	gene13	GALNT3	KDM5A	IL17RD	GALNT3
	gene14			KDM5A	USP53
	gene15	USP53	MMADHC	SRGAP3	CLEC14A
	gene16	RNLS	SRGAP3	GALNT3
	gene17	MMADHC	IL17RD	USP53
	gene18	KDM5A	LENG8	MYH9	IL17RD
	gene19	SRGAP3	GALNT3	RNLS
	gene20	LRBA	LRBA		LRBA
	gene21
	gene22		RNLS	MMADHC	MMADHC
	gene23			LRBA
	gene24				ATF2
	gene25	IL17RD	MYH9
	gene26		USP53	KCTD18	SNORD114-31
	gene27	SNORD114-31
	gene28
	gene29			CEP97	FNBP1L
	gene30				PRKAG2
	gene31		HDAC4
	gene32			HDAC4
	gene33				PDE4B
	gene34	PDE4B	SFRS12	PDE4B	KDM5A
	gene35	CEP97	FBXO31	FBXO31	KIF20B
	gene36	MYH9		LENG8	CDH19
	gene37	LENG8	CEP97
	gene38	ATF2	SNORD114-31		SRGAP3
	gene39	PRKAG2			CDH9
	gene40	PTPRZ1			HAUS3
	gene41	FNBP1L	PDE4B		UBE2E1
	gene42	SFRS12
	gene43	RASA1	KCTD18	SNORD114-31
	gene44	TMPRSS11F			CEP97
	gene45			UBE2E1	SNORD114-25
	gene46		SNORD114-25	PTPRZ1	TMPRSS11F
	gene47	KIF20B	CEP97		DCLRE1A
	gene48	CDH19	PRKAG2
	gene49	UBE2E1			ARL13B
	gene50	HERC6	RASA1		CSNK1G3
	gene51	KCTD18	C5orf36	ATF2	PCDH9
	gene52		IL1RL1	DCLRE1A	SNORD114-23
	gene53		TEX101	RASA1	HERC6
	gene54		BAI1	HERC6	MYH9
	gene55			C8orf79	MNAT1
	gene56	SNORD114-25	SLC10A7	PRPF40A	POU1F1
	gene57	CDH9	PTPRZ1	CDH19
	gene58	POU1F1		TEX101	TSPAN19
	gene59	FBXO31
	gene60			FNBP1L	SNORD114-23
	gene61			ZNF238
	gene62		ZDHHC20	TSPAN19	MAS1L
	gene63		UBE2E1	RGS7
	gene64	NAALADL2	PTP4A1	ZDHHC20
	gene65	PCDH9	TMPRSS11F	C14orf23
	gene66		KCTD5	SFRS12	SLC4A4
	gene67		NSUN3	PRKAG2
	gene68	LAMA2		CEP97
	gene69	CDH19			NAALADL2
	gene70	DCLRE1A	CEP97		SNORD114-25
	gene71		ATF2		NEXN
	gene72	ZDHHC20	ZNF236	SNORD114-25
	gene73	TSPAN19	DDR2
	gene74	HAUS3	CDH19	CDH9	SP4
	gene75	INTS6	C5orf47
	gene76			PCDH9	SNORD114-13
	gene77	SNRNP48	CEP97	SLC10A7	PLOD2
	gene78	C14orf23			CSMD3
	gene79	NSUN3	DCLRE1A	KIF20B	INTS6
	gene80		MAT2B	NSUN3	ERC1
	gene81	SNORD114-25	PHOX2A	NRXN1
	gene82		KIF20B
	gene83	ANK2			ADAMTS19
	gene84	ARL13B	ANK2		NMD3
	gene85		ACOX3		MYEF2
	gene86			POU1F1	OR8U1
	gene87	EYA4	TEX101	SNRNP48
	gene88	C8orf79	POT1	CEP97
	gene89	PRPF40A	ZSCAN23
	gene90	SNORD114-23	HAUS3	NAALADL2	SNORD114-31
	gene91		HERC6	CADM2	SNORD114-23
	gene92	NRXN1	A2M	MGA	FBXO31
	gene93	DUSP27		ARL13B	CSMD3
	gene94	SNORD114-31
	gene95	HDAC4	MYST4		ERBB2IP
	gene96	PLOD2	TSPAN19		CADM2
	gene97	C5orf47	CDH9	ACVR1C
	gene98	MNAT1	FNBP1L	ATP2A1	C14orf23
	gene99	GYS2	MIR1974	CDH19	SNORD114-26
	gene100	ZSCAN23	EFR3A		LAMA2
	gene101	DDR2	ACVR1C	SHOC2	PLA2G4A
	gene102	CSMD3		SEMA4G	CDH19
	gene103	ERC1		HAUS3	IQCF3
	gene104		CDH19	DDR2	PCDH9
	gene105	GSTCD	DYNLT1	PLEKHA7	C4orf43
	gene106	SLC10A7	NAALADL2	ZSCAN23
	gene107	TEX101	WWP1	LAMA2	UGT2A1
	gene108	CEP97	IL22	CSNK1G3
	gene109	EXOC2		TSPAN19	PTPRZ1
	gene110	NEXN	SNRNP48		KCTD8
	gene111		POU1F1	TMPRSS11F	GSTCD
	gene112	IL1RL1	FBXO11	GSTCD	KCTD18
	gene113	TSPAN19	CNGA1	ANK2	ZDHHC20
	gene114	C5orf36		DUSP27	EYA4
	gene115	CNGA1	LAMA2	MYST4	SNORD114-14
	gene116	SNORD114-23			KIF21A
	gene117	EFR3A	OR5J2	C5orf47	SNORD114-25
	gene118	WWP1	KCNJ1	SYT14L	ELMOD2
	gene119	CSNK1G3
	gene120			CNGA1	FIP1L1
	gene121	C17orf69	CUL2	NLK
	gene122	IL22	NRXN1	INTS6	RAD51AP2
	gene123	INPP4B	CEP97	EXOC2
	gene124	CADM2
	gene125	ZNF238	RIMS2		KRR1
	gene126	MAS1L	C8orf79	IL22
	gene127	SNORD114-13	ERC1		RASA1
	gene128		CDC73
	gene129		EXOC2	GPR18
	gene130		INPP4B	IL1RL1	SFRS12
	gene131	SEMA3A	C14orf23		EXOC2
	gene132	MBNL2	POLI	SNORD114-25	TSPAN19
	gene133		SCN9A	PTPRC	GULP1
	gene134	ACVR1C		EPB41L3
	gene135	SNORD114-23		WWP1
	gene136	RBM20	EIF4A1	PLOD2
	gene137	POU1F1	GMFB	ZNF624	UBR3
	gene138		IGF2R	INPP4B	DMP1
	gene139	ADAMTS19		AGR3
	gene140	ERBB2IP	LARP4B	RIMS2	ADK
	gene141	SP4		ASXL2	SERPINI2
	gene142		ZNF238
	gene143	CCDC82	DUSP27	CEP97	ANK2
	gene144				PCLO
	gene145	MYEF2			GPATCH2
	gene146	RIMS2	SHOC2
	gene147	ASXL2	PHF3
	gene148	SCN9A	RIMS2		GYS2
	gene149	IQCF3	C17orf69	ZNF236
	gene150	ELMOD2	APBB2	NEXN	CNR1
	gene151		TSPAN19	MBNL2	BZW2
	gene152	NDC80	RGS7	KCTD5	SNRNP48
	gene153		MAS1L
	gene154		KLHL1	LOC145474
	gene155		SLC16A7	FOXO3	COX10
	gene156	PCLO	ATP2A1	EFR3A
	gene157			CEP97
	gene158	ENPP4		RDX	PRPF40A
	gene159		VWC2L	CLK4
	gene160	KCTD8		ERC1	WWP1
	gene161	NLK	MIR143	SCG2	SLC26A7
	gene162	OR8U1	JMJD1C	PMS1	NDC80
	gene163	GULP1	EYA4	ADAMTS19	COG5
	gene164	KRR1	INTS6	TSPAN8
	gene165	CEP97	SEMA3A	EYA4	FMO9P
	gene166	SLC16A7	DIAPH3	SLC17A6	DNM3
	gene167			GYS2	CDC14A
	gene168	CNR1	CLK4	LAMA2
	gene169	HSPA13		SGMS1
	gene170	LOC646762	ATXN10
	gene171	COG5	ELMOD2		RNGTT
	gene172	VWC2L	SNORD114-13	RBM20	ZNF800
	gene173	PDE11A		CEP97	NEDD1
	gene174	SNORD114-26	PCDH9	CNR1
	gene175		ZNF624		DDR2
	gene176	SLC4A4	CCDC112
	gene177	ZNF624		SNORD114-31	ZNF624
	gene178	DNM3	IQCF3	CCDC82	ENPP4
	gene179			VWC2L
	gene180		MYEF2	ENPP4
	gene181	KLRA1	SNORD114-23		SNORD114-4
	gene182		ZNF211		SLC16A7
	gene183	LOC145474	DNM3	LOC646762	IMPA1
	gene184	EIF4A1	FAT4	CCDC112	FGB
	gene185	UBR3	SNORD114-25	MNAT1	TANK
	gene186	PLA2G4A		IQCF3
	gene187	SNORD114-8	MTMR9	CSMD3	ZSCAN23
	gene188		GYS2	KLRA1	ZNF238
	gene189	SNORD114-4	SNORD114-31	ING1	CDC73
	gene190	RFPL3S	CCDC82		EBAG9
	gene191	GULP1	AGR3	PROS1
	gene192	BBS9	MBNL2		BIRC6
	gene193	CDKAL1	CEP97	JMJD1C	AASDHPPT
	gene194		NLK
	gene195	FMO9P	C21orf34		FBXL5
	gene196	RAD51AP2	AKT3	GULP1	NSUN3
	gene197	PTPRC		SCHIP1	BBS9
	gene198	CADM2	LOC646762	SLC16A7	MBNL2
	gene199			EPHA6
	gene200		PTPRC		UBE2E3
	gene201		PRPF40A	NDC80	RBM20
	gene202	TEX101	MNAT1		CDKAL1
	gene203		SNORD114-23	DIAPH3
	gene204				SLC6A15
	gene205	JMJD1C		ZNF211	SLC10A7
	gene206	ZNF236	KLRA1	RAD51AP2
	gene207	PTP4A1	MRPL42	EIF4A1	GULP1
	gene208			SNORD114-26
	gene209	PEX3	LOC441208	C5orf36	OR14A16
	gene210	MGA	NIPBL	IGF2R	INPP4B
	gene211	C4orf43	SGMS1	POU1F1	EPB41L3
	gene212		ERBB2IP		RIMS2
	gene213		OR5K4		RRH
	gene214		NUPR1	NIPBL
	gene215	CEP97	ASXL2	TPD52	LCLAT1
	gene216	CEP97	SNORD114-23	OXR1
	gene217			ZFHX4	LOC646762
	gene218		POU1F1	ADAM2	MYBL1
	gene219			SEMA3A	POU1F1
	gene220				CCDC82
	gene221		UBR3	KCTD8
	gene222		ATL1	MYCBP2
	gene223	LYPLAL1		SSFA2	HSPA13
	gene224		GSTCD		CSRNP3
	gene225			MAT2B	ZFHX4
	gene226	AGR3	SNORD114-8	EBAG9	C17orf69
	gene227	DMP1	RPA3	SP4	SEMA3A
	gene228	CLK4		KRT24	DST
	gene229	WBP11	BZW2		C8orf79
	gene230		ARL13B	C17orf69	SCHIP1
	gene231	OXR1	KIAA1147		HISPPD1
	gene232			FRMD6
	gene233	OR14A16	HCN1	ERBB2IP	PTPRC
	gene234	CSMD3	MYO16	CDH19	IL22
	gene235	UBE2E3	MGA	SNORD114-23
	gene236	DIAPH3		MBNL1	DUSP27
	gene237	NMD3	FMO9P	CDKAL1
	gene238	MIR489	LOC145474		CACNA2D1
	gene239	OR5J2	XKR6	PCLO
	gene240	SNORD114-14
	gene241	PHF3			IL1RL1
	gene242	CDC73		PEX3	SCN9A
	gene243		COG5	DNM3
	gene244		GPATCH2	SOX5	TNPO1
	gene245	LOC441208		GULP1	SPATA6
	gene246	SERPINI2		BBS9	CXXC4
	gene247		LOC255025	BAI1
	gene248	EPHA6
	gene249	FOXO3	THOC4	NEDD1	HOOK1
	gene250	AASDHPPT	MBNL1		SPRED1
	gene251	EPHA6	ZFHX3	AKT3	CTNNA3
	gene252	DST		MAS1L	FOXO3
	gene253	SPATA6	VWDE	CDC73
	gene254	SNORD114-25	FAM190A	FLJ10213	CASP4
	gene255		RFPL3S		EPHA3
	gene256	BAI1			SATB1
	gene257		ADAM2	RFPL3S	STRN3
	gene258			MTMR9	PPP1R12A
	gene259	SYT1		ATL1
	gene260	KIF21A	UGT2A3	PPP3CA	LRBA
	gene261	CSRNP3	POT1
	gene262		IMPA1	SLC4A4	SNORD114-31
	gene263	CDH19	HSPA13	PCLO
	gene264	EBAG9		OR8U1	MIR103-1
	gene265	ZFHX4	OXR1	TANK	EPHA6
	gene266	RRH		ELMOD2	LIN28B
	gene267	PCDH9		SNORD114-23	SNORD114-9
	gene268	CDC14A	TIGD4	NBPF3	JMJD1C
	gene269	NEDD1	HERC4	OR2W1	SNORD113-2
	gene270	BET1	SP4	BET1
	gene271	GPR18	OR8H1	SCN9A	LYPLAL1
	gene272	C21orf34	C5orf35	SEC61G	DTWD2
	gene273			SNORD114-23	PTPRQ
	gene274	POLI	EPB41L3	APBB2	PRR16
	gene275	TTLL7		PTP4A1	PCDH17
	gene276		SNORD114-14	LAMA4	NRXN1
	gene277	LCLAT1			SNORD114-11
	gene278		MED13L	EYA1	SHOC2
	gene279		FAM19A5	MIR548B	SNORD114-27
	gene280	BZW2	PLOD2	MIR489	DTHD1
	gene281			ADK	YIPF7
	gene282		DTNBP1		MGA
	gene283		GULP1	CSMD3	CNGA1
	gene284	SATB1	MGAT4C		USP47
	gene285	HERC4	PCLO	FMO9P	HLTF
	gene286	ATL1	RNF150	GMDS	SYT14L
	gene287	TSPAN8	GATAD2A	TIGD4	ARL13B
	gene288			MANEA
	gene289	ARL13B	N4BP2	CSRNP3
	gene290	SNORD114-11		MYO16	SNORD114-8
	gene291		KRTAP4-4	OR5J2	SLC4A4
	gene292		CADM2	C21orf34	LIN7C
	gene293		WBP11
	gene294	TPD52	BBS9	PRKDC	ITFG1
	gene295	CACNA2D1		WBP11	FAM155A
	gene296	SYT14L	RRM2B	CADM2	CAPS2
	gene297			MYEF2	CADM2
	gene298	ZNF800	H3F3B	GRB14	TMED7-TICAM2
	gene299	NEK7	CDH18	HSPA13	SEC61G
	gene300	FGB	ADAMTS6	ANTXR2	OR10A6
	gene301	MBNL1	LOC100216001	AASDHPPT	SNORD113-2
	gene302	ADK	MIR548B		NDUFAF4
	gene303	SGMS1	EPHA6		FEM1C
	gene304	NIPBL		ROBO2	LOC145474
	gene305		MYCBP2	SATB1
	gene306	RDX	RAPGEF2	C4orf43	EHBP1
	gene307	EPB41L3	CAPS2	LOC100216001	TSPAN8
	gene308	UGT2A1	KRR1	KLHL1	PDE11A
	gene309	MTMR9	PLA2G4A	ANKRD28	GTDC1
	gene310	SSFA2	SNORD114-4		VWC2L
	gene311	SCG2	NEXN	DAZL	RIMS1
	gene312	MYO16	ENPP4	BBX	ASXL2
	gene313	CCDC112	SFRS11
	gene314	CDH18	SNORD114-26	UBR3	ANTXR2
	gene315	FAM190A	BBS9	DST
	gene316	SOX5			RIMS2
	gene317		EPHA6		CLASP2
	gene318	PCLO	CSNK1G3	SYT1
	gene319	SNORD113-2			STRN3
	gene320		FOXO3	PTP4A1	NAV3
	gene321	ADAM2	BET1	SNORD109B
	gene322	EHBP1	NDC80	RNF103	SLC16A7
	gene323	SCHIP1	ODF3L2		NLK
	gene324		BBX	KRR1	PHF3
	gene325	PCDH17	KCNJ1		CDH19
	gene326		SLC26A7	FIP1L1	HIPK3
	gene327		UBE2E3		STOML3
	gene328	ING1			PEX3
	gene329	TNPO1
	gene330			C18orf2	FRMD6
	gene331	ADAMTS6	SLC17A6		ACVR1C
	gene332	MYST4		ATP2C1	SYT1
	gene333	RNF103	MANEA	UBE2E3
	gene334		SEMA4G
	gene335	LOC100216001	SCHIP1	ZNF800	TTLL7
	gene336	GPATCH2	KLB	PHF20L1
	gene337	CXXC4	ZNF790		GPHN
	gene338	FOXP2	TMEM68	RRH	HISPPD1
	gene339				EFR3A
	gene340	LRBA			PIAS1
	gene341		KRT24
	gene342	SEC61G	VWA3B	LARP4B	PPP3CA
	gene343	TANK	TAS2R19	PCDH17	MTMR9
	gene344	COL8A1	PROS1	MAP3K7	RDX
	gene345	SNORD114-9		SCAPER	NFYB
	gene346	SPRED1	FLJ10213	FGB	REPS1
	gene347	FIP1L1	MUM1	SNORD114-8	ATP2B1
	gene348	RIMS1	DENND1B		PLCZ1
	gene349	CEP97	CSMD3	CA13	OSTN
	gene350			EPHA3
	gene351		GMDS	KAAG1	PTBP2
	gene352		RXRA	LOC441208	BET1
	gene353	SLC26A7		DTNBP1	PPP3CA
	gene354	KRT24	SATB1		ARGLU1
	gene355		RBMS1	SNORD114-9	KIAA1383
	gene356	CA13	MIR489		ADAMTS6
	gene357	FRMD6	PHF20L1	PLA2G4A	CSMD3
	gene358	TIGD4	SYT1	DEFB114	KLRA1
	gene359	MYBL1	ADAM2	ARL13B	PIK3C2G
	gene360	HLTF	RNLS	KIAA1147	PPP3CA
	gene361	TAS2R14	CDC14A	PHF3	WRN
	gene362	SLC6A15		A2M	DEFB114
	gene363	COX10	YES1	SERAC1	HERC4
	gene364	LARP4B			NEK7
	gene365	SNORD113-2	DIAPH3	TMED7-TICAM2	TTC35
	gene366	ANKRD17			EPHA6
	gene367	OR2W1
	gene368	EPHA3	RBM20	MIR1974
	gene369	POT1	RNF103	SERPINI2	EHBP1
	gene370	HISPPD1	MBNL1	HIPK3
	gene371	GMDS	CDH19	EPHA6	MIR548B
	gene372	COBLL1	TSPAN19	PCDH9	IFNA13
	gene373	BBX	IMPA1	SLC16A7	TCF12
	gene374	PLCZ1	LCORL		CNOT2
	gene375	PPP3CA	ANKRD28		ZNF211
	gene376		TCF12	ADAM2	DDX4
	gene377		PDE11A	LCLAT1	COBLL1
	gene378		NMD3	OR5K4	SNORD114-22
	gene379	BZW2	TACR1		ING1
	gene380	MAP9	SEMA3A	SPATA6	CTNNA3
	gene381	MIR548B	ADAMTS19	DIAPH3	EIF3H
	gene382	ZNF211	KCTD8	SNORD114-13	CEP97
	gene383	DEFB114		TTLL7	AGR3
	gene384	FAM155A			PMS1
	gene385		MAP9	PXDNL	PLEKHA5
	gene386	RIMS2	PPP3CA	CSRNP3	VRK1
	gene387	RNGTT	MYO6		USP25
	gene388		HLTF	PTPRQ	ARID1B
	gene389	SOX5	SNORD109B	MAN1A2
	gene390	MIR30D	OR2W1	NFIB
	gene391			GTDC1	DTHD1
	gene392	DIAPH3	EHBP1	DMP1	FAM98A
	gene393	SEH1L	TPD52	NEK7	ELP4
	gene394	DDX4		LYPLAL1	ZMYM2
	gene395	SLC16A7		SLC35B3
	gene396	MANEA	PXDNL		FUBP1
	gene397	SNORD109B		SHOC2	SNORD109B
	gene398	ITFG1	SEH1L		GPR18
	gene399	SNORD109B	BCL11B	ABHD10	MIR30D
	gene400	KCTD5	SPATA6	MAP3K7IP2	SNORD114-13
	gene401	BIRC6		HLTF	CLCN3
	gene402	SLC35B3	PRKDC	KIF21A	SERPINI2
	gene403	STEAP2	CD36	OR14A16	TWF1
	gene404	PROS1	CDKAL1		ARHGEF12
	gene405	AKT3	PLEKHA7		ZNF493
	gene406		C4orf43
	gene407	C18orf2	CASC4	SNORD114-11	LENG8
	gene408	PMS1	PEX3	POLI	POLI
	gene409	MIR103-1		FRS2	MAP3K7IP2
	gene410		FOXP2
	gene411	ANTXR2	TAS2R14
	gene412	GRID2	EYA1	BZW2	KRT24
	gene413	LCORL	MAD1L1	C14orf149	SNORD114-23
	gene414	FAM172A	PCLO		C5orf47
	gene415		PAPOLA		HTN1
	gene416	PRR16	ASB7	HERC4	GRID2
	gene417	HIPK3			GULP1
	gene418		PRR4	CDH18	ENPP4
	gene419	SNORD114-22	NEK7	IMPA1	LAMA2
	gene420	LIN7C		ANKRD17	ROD1
	gene421	ROBO2	NEDD1	YIPF7	MRPS9
	gene422	BBS9		GATAD2A
	gene423		CXXC4		OXR1
	gene424	EYS	GRID2	N6AMT1	SOX5
	gene425		SELENBP1		LRFN5
	gene426	ANKRD28	GULP1		SOX5
	gene427	HOOK1
	gene428	PTPRQ	ING1	COG5	LCORL
	gene429	NAV3	SLC4A4		TANC2
	gene430	SLC4A4	TNIK	GPATCH2	LIN28B
	gene431	REPS1	GPR18		ANKS1B
	gene432	CSN3	CADM2	NFIB	ROBO2
	gene433		CACNA2D1		GUF1
	gene434	ZNF317	DMP1	TEX101	SLC35B3
	gene435	KLB	SNORD114-25	FOXP2
	gene436	SHOC2	CA13		TNPO1
	gene437
	gene438	TCF12			CENPP
	gene439	RGS7	OR8U1	POT1	C5orf43
	gene440			IMPA1
	gene441	CTNNA3	CFH	RIMS2	GMDS
	gene442	UST	CNR1
	gene443	USP47		FSD1L	EIF4A1
	gene444	DTHD1		EHBP1	NBEAL1
	gene445	PHF20L1		CASP4	ANKRD17
	gene446	ZNF407	MAD2L1	DDX4	VTA1
	gene447	DTHD1	TNPO1	RBM12B	FAM190A
	gene448	PPP1R12A	DUSP10		DIAPH3
	gene449	SLC7A11	SEPT7	MIR30D	NIPBL
	gene450		FEM1C		TMEM68
	gene451	SHOC2	SOX5		C14orf149
	gene452	PTBP2	KAAG1	SNORD114-25	MAP9
	gene453	MRPL42			SC4MOL
	gene454	TCF12	FGB	PEG10	FAM172A
	gene455	STRN3	L3MBTL3	TCF12	EFR3A
	gene456	SNORD114-27		ZNF317
	gene457	FEM1C	SNORD114-11	PPP1R12A	GRB14
	gene458	STOML3	TMTC1	PDE11A	MIR1279
	gene459		LAMA4	RIMS1	STEAP2
	gene460		HIPK3	SNORD114-22
	gene461	LRRC3B	GRB14	POT1
	gene462		DTHD1	MYBL1	OTUD6B
	gene463	LRFN5	ZNF407		FAM135A
	gene464	TTC35	SNORD109B
	gene465	MAT2B		PRKACB	SSFA2
	gene466	TMED7-TICAM2	NBPF3	LIN28B
	gene467	CASP4			SLC30A9
	gene468	PTP4A1		UGT2A3	ADAM2
	gene469	ATP2A1			UST
	gene470		TTLL7	SEH1L	ATF7IP
	gene471	CLASP2	FAM190B	FAM19A5	ZMYM2
	gene472	APBB2	NDOR1		PTP4A1
	gene473	TWF1	MAP9	C5orf35	BLZF1
	gene474	CAPS2	ITFG1	PTPRC	EPS8
	gene475	SOX6	FAM172A	PRPF39	MIR592
	gene476	PIK3C2G			ROBO1
	gene477	LAMA4	RRH	NUPR1	ME1
	gene478	ATP2C1		NMD3	TNRC6A
	gene479	GULP1		RAP2A	TAS2R14
	gene480		ADK
	gene481	MYCBP2	AASDHPPT		CAPS2
	gene482		RAD51AP2		ZCWPW2
	gene483	C5orf33	SERPINI2		ZNF236
	gene484	CSMD3		SPRED1	NFIA
	gene485			MIR592
	gene486	DTNBP1	RIMS2	LCORL	FLJ25363
	gene487	FBXL5	COBLL1	NME7
	gene488			NAV3	SEH1L
	gene489	C14orf149	BZW2	UACA
	gene490		C14orf149	CACNA2D1	TMEM64
	gene491	YIPF7	ZSCAN22	TNPO1
	gene492	MIR1974	LPHN3	TES	DIAPH3
	gene493				SSFA2
	gene494			GRID2	TTLL7
	gene495	PRKDC		ZNF407	EGLN1
	gene496			LIN7C	LOC100216001
	gene497	OSBPL8	LAX1	CD36	LCOR
	gene498	POT1	SHQ1	C11orf46	FAM190A
	gene499	CTNNA3	VPS26A	MBNL1	COL8A1
	gene500	NDUFAF4	COX10
	gene501	N6AMT1	SYT14L	CDC14A	MIR489
	gene502				PEG10
	gene503		SCG2		FAM190B
	gene504	FLJ10213		ZMYM2
	gene505	SNORD114-31		TAS2R14
	gene506	GMFB	NFIB	P2RY14	CASP4
	gene507	LIN28B	SPRED1	IKZF3	KATNAL1
	gene508	STRN3	ZFHX4	MAP9
	gene509	GPHN	ARL13B	EHBP1	MAN1A2
	gene510		ANKRD17		SNORD109B
	gene511	VRK1	CUL1	HCN1
	gene512	RIMS2		CNOT2	SNORD114-29
	gene513	A2M	ERBB4	ELF1	SEMA3A
	gene514	PIK3C2G	SPRED1	SHQ1
	gene515		CSRNP3	VRK1
	gene516	SMC3	SCAPER
	gene517			CSMD3	CEP97
	gene518	TCF12		NBEAL1
	gene519		KLK13	CHCHD3	EYS
	gene520	OR5K4	LRBA	SLC6A15	C5orf36
	gene521	FAM190B	ZNF770	GULP1	CSN1S1
	gene522	SLC17A6	ATPBD4	TWF1	RNF103
	gene523	LIN28B	MIR30A	ODF3L2	STIM2
	gene524		UGT2A1	FAM155A	OSBPL8
	gene525	KATNAL1	LYPLAL1	OR8H1	GAS2
	gene526	GTDC1	LIN28B	SNORD114-14	CSN3
	gene527	EFR3A		TMEM68	CAPN7
	gene528	LCOR		ADAMTS6	PIK3C2G
	gene529	DYNLT1	EFR3A	FAT4	PLEKHF2
	gene530	CNOT2	PLA2G16
	gene531	DACH1	STK3	HS2ST1	PROS1
	gene532			ACOX3	NRXN3
	gene533	CAPN7		BZW2	SMC3
	gene534			SHOC2	DICER1
	gene535	ATP2B1		DICER1	LOC441204
	gene536		RDX	SPEN	PCDH9
	gene537	ARHGEF12	PEG10	BBS9	MTMR9
	gene538		SSFA2	ITFG1	PHF21A
	gene539		CSMD3	PPP4R2
	gene540		BIRC6	COBLL1	XRCC4
	gene541	TNRC6A	TNFAIP6		ABCB1
	gene542	LAMA2
	gene543	MBNL1	TWF1	FAM98A	LOC441208
	gene544	HISPPD1	MAP3K7	DTHD1	HNRNPR
	gene545			TCF12
	gene546	TACR3	MIR30D	CSMD3	PHTF2
	gene547	ARGLU1	PCDH17	C12orf73	SP4
	gene548	CLDN1		UST	RBM12B
	gene549	KCNJ1	KIF21A	FAF1
	gene550	TCF12	SHOC2	PLCZ1	TAP2
	gene551		YIPF7	STOML3	LAMA4
	gene552	TMEM64	RIMS1	RICS	TCHHL1
	gene553	BANK1	EBAG9	SPRED1	SCG2
	gene554		STEAP2	DTWD2	OR13A1
	gene555	DICER1	TNIK	FBXO11
	gene556		POT1		MYO16
	gene557	SERAC1	CCAR1	OPA1	MIR548H3
	gene558	TMEM232	OR14A16	DENND1B	OPRL1
	gene559	COL4A3BP		VWDE
	gene560	CENPP	CAB39L	UBL3	INTU
	gene561	SEMA3A	GULP1		TMEM232
	gene562	IMPA1	EYS	CAPN7	UBE3A
	gene563		TSPAN8		PMS1
	gene564				CDKL2
	gene565	VPS26A	SNX4	LRBA	TCF12
	gene566	SYT14			RGS7
	gene567	MRPL44	SHOC2		PDE10A
	gene568	PEG10			SSBP2
	gene569			UGT2A1	TPD52
	gene570	FUBP1	LAMA2	YES1
	gene571	RNF150	CLDN1	REPS1	TES
	gene572			SNTG2	JMJD1C
	gene573	MIR592	PPARGC1B	PRR16	CEP97
	gene574	EHBP1		TCF12
	gene575	ZNF493	HERC6	KLB	FBN2
	gene576		UACA		DACH1
	gene577	PRPF39		FAM190B	C18orf2
	gene578	VWDE		CD3G	RFPL3S
	gene579	TRIM36	C6orf10	BDP1	HDAC4
	gene580			TMEM232	SLC7A11
	gene581	ZMYM2	PGAP2	MRPL44	API5
	gene582	GRB14	TRIM36	C12orf73	PRPF39
	gene583	MAN1A2	HDAC9
	gene584	ANKS1B	STRN3	CENPP	ASZ1
	gene585	LCORL	PTBP2	DTHD1	TEX101
	gene586	ODF3L2	TMPRSS11B		ETNK1
	gene587	EYA1	DST	GRID2	EXOC5
	gene588		FIP1L1	API5
	gene589	PPP3CA	SMURF2	DLEU1	JMJD1C
	gene590	PLEKHA5	RBM24	MED13L	RGS22
	gene591	GRID2		POT1	NOVA1
	gene592	PHF21A			C21orf34
	gene593	C21orf91	PCDH9	SOX5	CLK4
	gene594	DTWD2		RIMS2	C5orf33
	gene595		CLASP2
	gene596	SNORD114-13	IMPA1	GPHN	ATP2C1
	gene597	SERPINI2	FBXL5	ATP2B1	SDCCAG8
	gene598	CLCN3	ATXN3		C11orf46
	gene599	WFDC11	ATM	CEP170	PCLO
	gene600	SLC30A9		TTC35
	gene601	FAF1	CAPS2	COL8A1	MED23
	gene602	LOC441204	ZNF800	PTPRC	CDC73
	gene603	OTUD6B	SNORD113-2	SNORD114-4	FAF1
	gene604	TANC2	ZNF317	DACH1
	gene605	OSTN	SLC7A11	LYSMD3	TSC22D2
	gene606	PIAS1	MYBL1		RIMS2
	gene607		RNF6		RNF182
	gene608	USP25	C5orf33	HTN1	COL4A3BP
	gene609			RNF6	COL3A1
	gene610	MIR30A		USP25	ATL1
	gene611	TES	DEFB114	LMO7	GLS
	gene612		NDUFAF4	PTBP2	CD3G
	gene613	API5	PCNX	GLS	EEA1
	gene614	SP4		SLC4A4
	gene615	ZCWPW2		LRFN5	WRN
	gene616	ATP13A3		MLLT10	TRPS1
	gene617	IFNA13	SNORD114-22	CDC73	MRPL44
	gene618	ZMYM2	MAP2K4	ROD1	CLCA3P
	gene619	ATM			ZNF317
	gene620		C9orf21	MYO6	CEP97
	gene621	ADAM2	PRR16	MIR103-1	WASF1
	gene622	JMJD1C		KCNJ1
	gene623		DDX4	IMPA1	MBNL1
	gene624		UVRAG	ENPP4
	gene625	PCDH9	STARD13	MAN1A2	SERPINI2
	gene626	ABHD13		BCL10	IL8
	gene627	ROD1	COL8A1	STRN3	TACR3
	gene628		SEC61G	STEAP2	PLEKHG7
	gene629	WRN	SOX5	BIRC6	SOX6
	gene630	ING3	PTPRC	CHSY3	SHOC2
	gene631	ME1		TRPS1
	gene632	SNORD114-10	TTC35	CLCA3P	SHOC2
	gene633	C18orf2	FCHSD2	CFHR4	CA13
	gene634	DENND1B		FAM190A	SNORD114-31
	gene635	CSRNP3		SNORD113-2	LCORL
	gene636		FRMD6	SNORD113-2	RALGAPA1
	gene637	MTMR9	DYDC1
	gene638	TAP2	TXNDC3		ATG12
	gene639	CD3G		PJA2	SPATA5
	gene640	MIR1279	GRID2	ATP13A3	WDR36
	gene641	MIR489	ETNK1		C21orf91
	gene642	GLS	TUBGCP2		SNORD114-10
	gene643		NEK1	ZNF286B	MTMR9
	gene644	MYO6	PHF21A	SPAST
	gene645		LCLAT1		FSD1L
	gene646	MIR548H3	JMJD1C		HISPPD1
	gene647	PLEKHA7	ROD1	KCTD3	UBE2E3
	gene648	FKBP5		SLC7A11	N6AMT1
	gene649		SNORD114-9	PIAS1	NCOA1
	gene650	HDAC9	LOC493754	SOX6	NT5C3
	gene651	ATF7IP		CXXC4	SR140
	gene652			TAP2
	gene653	NBPF3		DLG2	FAM172A
	gene654	POT1	PMS1	HISPPD1	MIR218-1
	gene655	STK3	P2RY14	HOOK1
	gene656			CPNE3
	gene657		BDP1		DZIP3
	gene658	SMURF2		PHOX2A	CHD9
	gene659	FAM98A		C14orf138	OR5J2
	gene660	HTN1		FAM172A	TCF12
	gene661			POT1	MYST4
	gene662	EGLN1	ATP13A3		CEP170
	gene663	CLCA3P		ANKS1B	SLC25A26
	gene664	ATPBD4	ZNF85	TCF12	GBE1
	gene665	BDP1		C6orf10	BBX
	gene666	IMPA1	MAP3K7IP2	XRCC4	ASAP1
	gene667				UACA
	gene668
	gene669		COL4A3BP	DYNLT1
	gene670	NBEAL1	DTHD1	PLEKHF2	ANKRD28
	gene671	DLG2	HOOK1	NRXN1	OR5T3
	gene672	ASZ1	PRKDC	PHF14	ERC1
	gene673	EXOC6B	PLA2G16	SNORD109B
	gene674	STIM2	C18orf2	RNGTT
	gene675	SCAPER	LCOR	SLC4A7	NCRNA00159
	gene676	CAPS2	STOML3	NDUFAF4
	gene677	QKI		C3orf58
	gene678	ATG12			CPEB3
	gene679	EIF3H	AGPAT3	CCDC7	CPS1
	gene680	IMPA1	ATXN10	N4BP2	CSMD3
	gene681		RNGTT	LHX9
	gene682	OR10A6	LRRC3B		CAV2
	gene683	LPHN3	SLC16A7	SR140	USP47
	gene684	ANKRD50	STRN3	AGBL3	TSGA10
	gene685	C11orf46	DYRK1A	BCL11B	WBP11
	gene686	PLA2G16	RAP2A
	gene687		API5		SPATA16
	gene688	ARID1B	SNORD114-27	RNLS	NME7
	gene689	KIAA1147	BTRC		HS2ST1
	gene690	CC2D2B	GNAS	LRRC3B	CBR4
	gene691	KIAA1383	CAPN7
	gene692	OR6K3	ARHGAP10	GPC5	TCF12
	gene693	NEK1	UBB	CC2D2B	DSG1
	gene694	CD36		CTNNA3	PHF14
	gene695		ANKS1B
	gene696	SHOC2	EPHA3	THUMPD2	PAN3
	gene697		C5orf30	SHOC2	CHD2
	gene698	MAN1A2		EYS	MRPL42
	gene699	NFIA		MRPL42	PLEKHA7
	gene700	SHQ1		MED23
	gene701	CCNC	CSN3	SEMA3A	AASDHPPT
	gene702	ROBO1	ROBO2	KCNJ1	DGKH
	gene703		OSBPL8		ELF1
	gene704	UACA	FRS2	CHIC2	MIR103-1
	gene705	FRS2	NDST4	ARGLU1	LHX9
	gene706	NOVA1	BTF3	PPP1R14B	MOBKL1A
	gene707	MTMR9		PRR4
	gene708			PLEKHA5	MIR103-1
	gene709	CDC73			ZNF280D
	gene710	PDE10A		PARD3
	gene711	EPS8		RIMS2	HNRPLL
	gene712	N4BP2	LOC348840	EDIL3
	gene713	GABRA4			ABHD13
	gene714		HISPPD1		DCLRE1A
	gene715	ABCB1	PJA2	PCDH9
	gene716	OR8H1	SPEN	COX10	VPS26A
	gene717	SPRED1	DIS3	KATNAL1	SFRS12
	gene718	FBXO11	PCNX	FEM1C	ING3
	gene719	SNORD114-29	ZNF430	SMC3	LHX9
	gene720	HIPK3	WDR63	C5orf33	MAP3K7
	gene721	NELL2	C21orf91		NFAT5
	gene722	SERPINI2	FXR1		FH
	gene723	FAM172A	MRPL44	CSN3	CCDC112
	gene724		TANK	LCORL	EDIL3
	gene725	GALNT13
	gene726	SEMA4G	IFNA13		RICS
	gene727	KLK13		TNIK
	gene728	C21orf34	ATP2C1	MIR489	PTP4A1
	gene729	RBM12B	MIR103-1	2023-03-08
	gene730		ANTXR2	NCOR1	EXOC6B
	gene731	OPRL1			SYT14
	gene732	NFIB	UBL3
	gene733	PPP3CA	FAM98A	NFIA
	gene734	PLEKHF2	CALCA	OSTN	MORN2
	gene735	TMEM68	WFDC11	ING3
	gene736			EEA1	FOXP2
	gene737	MAP3K7IP2	SNORD113-2	EIF3E	QKI
	gene738	RAD54B	CASP8AP2	C3orf16	C18orf2
	gene739		TANC2		UTRN
	gene740	SNORD114-31	CHCHD3	MIR218-1	SEMA3C
	gene741	CHSY3	TRIM61		STK3
	gene742		PLCZ1	MTMR9	SMEK2
	gene743			THOC4
	gene744	KCNJ1	ARMC3	TMEM195	PCDH15
	gene745	OR13A1	USP47	SEPT13	ZNF286B
	gene746	PCCA		DENND4A
	gene747	ENPP4	SLC6A15	TACR3
	gene748				PUM2
	gene749	C13orf31	PRKACB	OSBPL8
	gene750	NFYB		CLASP2
	gene751	HS2ST1			CBLL1
	gene752	OPA1	CLCN3	LIN9	MANEA
	gene753			PIK3C2G	BZW2
	gene754		TCF7L2		FRK
	gene755	UGT2A3	LIN7C	EYA1	RUNX2
	gene756	BCL10	GTPBP4	ASZ1	ELMOD2
	gene757	ARHGAP10	GIMAP5	GAS2	ZNF407
	gene758	ZNF286B		RNF150	MIR30A
	gene759		TNRC6A	STRN3
	gene760	PPP4R2	CHSY3	HECW1	LRRC3B
	gene761	VTA1	HISPPD1
	gene762	EEA1		SNORD114-31	MYCBP2
	gene763	SEMA3A	PTP4A1	SEMA3A	ATP13A3
	gene764	IGF2R	SOX6	CUBN	TMEM67
	gene765	MIR143	G3BP2		MED12L
	gene766	NME7	LOC202181	SERPINI2	STRN
	gene767	RRP15	TAS2R14
	gene768	TAS2R14	LRFN5	PHTF2	PCNX
	gene769	PCNX	ARMC9	PARN	KCNJ1
	gene770		ADAMTSL2	ATM	ITGA6
	gene771	NT5C3	TCTN2	PLEKHG7	CC2D2B
	gene772	C12orf73	CTNNA3		WASL
	gene773	ETNK1		HDAC9	CCDC7
	gene774		EPS8	CLDN1
	gene775	SLC4A7	LOC254559	ALCAM	TFPI
	gene776		PTPRC	PANK2	CADPS2
	gene777	SPEN	CAMTA1	WDR36	RRAS2
	gene778	COL3A1	C3orf16		RFX7
	gene779	GUF1	C11orf46	ARID4A
	gene780	XRCC4	UBAC2	PIK3C2G	RAP2A
	gene781	MAP2K4	PDE10A	CEP97	CSRNP3
	gene782		FAM155A	STK3	CD55
	gene783	CDKL2	REPS1
	gene784	PXDNL	KIAA1109	SLC30A9	SGMS1
	gene785		PPP1R12A	COL4A3BP	GRID2
	gene786	ELF1	MAN1A2	FBXL5
	gene787	SSFA2	STK38L	USP47
	gene788	OR5D18			C21orf34
	gene789		FAM13AOS	PRH1	ZNF330
	gene790	EDNRB	EHBP1	LIN28B	LMO7
	gene791	NCOR1		FUBP1	POT1
	gene792	ENAH	CASP4	CHD2	CD2AP
	gene793				ARMC8
	gene794	FAM190A	SERAC1		IL15
	gene795	EDIL3	OTUD6B	SYT14	CEP97
	gene796		PTPRQ	C13orf31	ZEB1
	gene797	FAM126A	QKI	CSMD3	BANK1
	gene798	NCRNA00159		ATPBD4
	gene799	ACOX3	TES	ME1	ATP2A1
	gene800	RUNX2	DENND4A	SEMA3C
	gene801		DAZL	ENAH	FBXL3
	gene802	PMS1	LIN28B	STARD4	OR2W1
	gene803		NT5DC1
	gene804	HNRNPR		RAD54B	DLG2
	gene805	GAS2	FUBP1		IQUB
	gene806	ABHD10	TMEM232	NEK1	GALNT13
	gene807		OPRL1	CAB39L	GPC5
	gene808	DNAJC1		OTUD6B	ALCAM
	gene809	TMEM68	MTMR9	LCOR	ZNF292
	gene810		SNTG2	CWC15
	gene811	CSN1S1	PIK3C2G	SLC26A7	MAP2K4
	gene812	SFRS11	SLC4A7		CSN2
	gene813	CCDC7	ROBO1	SMURF2	RICTOR
	gene814			CTNNA3
	gene815	UBL3	LCORL
	gene816	RAP2A			C1orf185
	gene817	ATP8A2	CCNC		MAN1A2
	gene818		PHLPP2		TGDS
	gene819	SEPT13	CSMD3	PTEN	FLJ10213
	gene820	ELP4		ATP8B1	MLLT10
	gene821	PHTF2	IFI16	ZNF280D
	gene822	CEP97		GABRA4	TEX101
	gene823	PANK2	IKZF3		OR10AG1
	gene824	CPS1	GPC5
	gene825	MTMR9	FAM172A	TNRC6A	SETDB2
	gene826	MLLT10	CSMD3		NBPF3
	gene827	SR140	LCOR	CASP1	MAP2K4
	gene828	FSD1L			LIN9
	gene829	IKZF3	BANK1	FAR2	GLRB
	gene830	SNORD114-23	DHRS1	STXBP5	NR1D2
	gene831	HCN1	PDE4D		ATM
	gene832	RICS	USP45	ZCWPW2	MIR1279
	gene833	FAR2		ZFYVE9	FAM126A
	gene834		CTNNA3	ANKRD50	ARID4A
	gene835	TMPRSS11B	TMED7-TICAM2	MAP9
	gene836	C5orf43	C18orf2
	gene837		SNORD114-31	FRK	OR6K3
	gene838	CPNE3	DACH1	CAPS2	SFRS18
	gene839		LIMCH1	SERPINI2	CCNC
	gene840		PIK3C2G		CTNNA3
	gene841		B3GALT2	SNORD114-31	PHF20L1
	gene842	TRPS1	FLJ10213		SFRS11
	gene843	FAT4		C5orf43	TRIM36
	gene844	AGBL3		SYNGR3
	gene845	EYA1	TCF12	LOC441204	C1orf185
	gene846	DAZL		TTC33	MIR30B
	gene847	PTPRC	FAR2	ZFAND6
	gene848	CHCHD3	GUF1	TAS2R14	ZFR
	gene849	FBN2	EFR3A		CLASP2
	gene850		IMPA1		FLJ40504
	gene851	CSMD3	MTMR9	HIPK3	C21orf34
	gene852	UNC5D	VRK1	CEP350	ASXL2
	gene853	IRAK1BP1	KATNAL1	ARHGEF12
	gene854	PHF14	ATP2B1	CYP1B1	SLC4A7
	gene855	CAB39L	PTPN1	OPRL1	OR8H3
	gene856	CBR4	MIR489		PCCA
	gene857	CSN2	N6AMT1	ATG12	HOMER1
	gene858	C1orf185	PRPF39	SLC7A11	ACER3
	gene859	TTLL7	QSOX2	HISPPD1
	gene860			IFNA13	GMFB
	gene861	MAP2K4			EFR3A
	gene862	MED23	LMO7	UNC5D	ODZ3
	gene863	FAM135A	SNORD114-13	TRIM36	AGBL3
	gene864	SNTG2	TRA2B	C2orf67	PPP4R2
	gene865		ROBO2	EFR3A	BCL10
	gene866	INTU	SH3D19	GALNT13	ATP2C1
	gene867	PTP4A2	HDAC4		TIGD4
	gene868	TSC22D2	RUFY4		PAN3
	gene869	POT1
	gene870	CASP4	LEPR		SNORD114-22
	gene871	MOBKL1A	ZMYM2		C13orf31
	gene872	NRXN3	SNORD114-10
	gene873	RIMS2	MON1B		DIAPH3
	gene874		NAV3		LYSMD3
	gene875	MIR218-1			SEMA3A
	gene876		FKBP5
	gene877	ARID4A	MIR1279		BBS9
	gene878	FLJ25363	SYT14		ACER3
	gene879	GATAD2A	HTR1F		FAT1
	gene880	KLHL1	GABRG3		SLAIN2
	gene881	FRK	GPHN		ZFP91
	gene882	YTHDC1	OR6K3		MYO6
	gene883	WDR36	NCOR1
	gene884		C10orf118		SCRN3
	gene885	PTEN	ZMYM2
	gene886	DSG1	GLT25D2
	gene887	DZIP3	SCAND3		AGR3
	gene888	SDCCAG8	RUNX2
	gene889	EIF3E			OR5D18
	gene890	EFR3A	CNOT2		EYA1
	gene891	CHD9	RRP1B		BRWD1
	gene892	SHOC2	UGGT1		USP53
	gene893	RRAS2	RAB40B		PTPRC
	gene894	TNPO1	PPP3CA		IFNA14
	gene895	OR10AG1	SP4		RAD54B
	gene896	EFR3A	STIM2		OR13A1
	gene897	KIAA1109
	gene898	WDR89	RAD54B		PPP3CA
	gene899	WASF1	POT1		PBK
	gene900	PRKACB	ABHD10		C1orf9
	gene901	UBE3A	NT5C3		DNAJC1
	gene902		ASB10		EYS
	gene903		MAP2K4		CSTF3
	gene904		ATF7IP		MIR489
	gene905	MRPS9	IPO5		EYA1
	gene906	MIR30B	IFNGR2		TMEM232
	gene907	2023-03-08	TRIP12		FKBP5
	gene908	CEP170			ATAD1
	gene909		DTWD2		2023-03-08
	gene910	ZNF280D	DYRK2		EPS8
	gene911	C6orf10	GRSF1		DYRK1A
	gene912	CUL2			UBLCP1
	gene913	RALGAPA1
	gene914		ABCA5		BCAS3
	gene915	MAP9			ST18
	gene916	ZFAND6	PCCA		ARHGAP15
	gene917	C3orf16			ALB
	gene918				ZMYM2
	gene919	LMO4	ST3GAL1		PANK2
	gene920	DPYD			ACTL6A
	gene921		TCF12		ZBTB41
	gene922	MRPL13	FAM168B
	gene923	PCMTD1	EXOC6B		HTN3
	gene924	SPATA5	C7orf50		HISPPD1
	gene925	SEMA3C			GPBP1
	gene926				UGT2A3
	gene927
	gene928				PCCA
	gene929				PTEN
	gene930	TSGA10			SERAC1
	gene931	ARID4A			DENND1B
	gene932	ROBO2			DUSP12
	gene933	BLZF1			SFRS18
	gene934	CD302			WFDC11
	gene935	EYS			AGL
	gene936	HOMER1			APBB2
	gene937	STRN
	gene938	PHOX2A			SHOC2
	gene939	CFHR4			PPM1B
	gene940				OR5K4
	gene941	ATP8B1
	gene942				ARHGAP10
	gene943
	gene944	CDC7			ANKRD50
	gene945	DGKH
	gene946				SNX13
	gene947	TCHHL1
	gene948				ZNF326
	gene949	AASDHPPT			AKT3
	gene950				PRKDC
	gene951	OR6C76			DYNC1I2
	gene952	FBXL3			DEPDC1B
	gene953				ST8SIA4
	gene954	SC4MOL			ERC1
	gene955	TMEM195
	gene956	BCAS3			TMEM68
	gene957	AHCTF1			MAT2B
	gene958	ERC1			PRKACB
	gene959	P2RY14			METTL4
	gene960	SFRS12
	gene961	RPA3			KCTD3
	gene962	SNORA70B
	gene963	GBE1
	gene964	PTPRC
	gene965
	gene966	BCL11B			ADAM2
	gene967	PAN3			TMEM195
	gene968	NCOA2			C3orf58
	gene969	UBP1			SELT
	gene970	LMO7
	gene971	EXOC5
	gene972	OR14A16			TP63
	gene973	RFPL3S			NR2C1
	gene974	TSPAN19			2023-03-01
	gene975	CADPS2			ZNF506
	gene976	CSMD3			FAM162B
	gene977
	gene978	SNORD114-22			RUNX1T1
	gene979	NRXN1			MYRIP
	gene980	ZNF770			B3GALT2
	gene981	DCHS2			SEMA3C
	gene982
	gene983	LIN9			WDR89
	gene984	ALCAM			OR14A16
	gene985				HBS1L
	gene986	PLEKHG7			ATP8A2
	gene987	CBLL1			NEK1
	gene988				KIAA0528
	gene989				RICTOR
	gene990	CHD2			TDRD3
	gene991	ACTL6A			B3GNT6
	gene992				PDE5A
	gene993	SH3D19			USP6NL
	gene994	MAP3K7			ANKRD12
	gene995				SPEF2
	gene996	HTN3			ENAH
	gene997	TGDS			ULK4
	gene998	C6orf167			PARK2
	gene999	GPC5			CLINT1
	gene1000	NFAT5			JMJD1C
	gene1001				GALNTL6
	gene1002
	gene1003	C6orf41			KCND2
	gene1004	PPM1B			EDNRB
	gene1005				PRH1
	gene1006	PRR4			NFXL1
	gene1007	IL8			TANK
	gene1008	ERC1			DENND4C
	gene1009	ABCA5			C1GALT1
	gene1010				DPY19L4
	gene1011	CAV2			DEFB113
	gene1012
	gene1013	MYRIP
	gene1014	ANTXR2			SPEN
	gene1015	POT1
	gene1016				CEP97
	gene1017	CD55			DTNBP1
	gene1018	TFPI			MTMR7
	gene1019	MED13L			NELL2
	gene1020	ST18			ARID1B
	gene1021	RNF6			SLC7A11
	gene1022				KLHL28
	gene1023	ZFYVE9
	gene1024	CPEB3
	gene1025	LYSMD3			NRXN1
	gene1026	AGR3			NTM
	gene1027	CADM2			SEMA4G
	gene1028	DEFB113
	gene1029				CNTN6
	gene1030	RFX7			CHRM2
	gene1031	DYRK1A
	gene1032	OR5T3			PDGFC
	gene1033				NDUFS4
	gene1034				TP63
	gene1035				POT1
	gene1036				C14orf129
	gene1037
	gene1038	KAAG1			2023-03-01
	gene1039	EML4			BAI1
	gene1040	SOX5			PTP4A2
	gene1041	C1orf185
	gene1042				CAV2
	gene1043				VTA1
	gene1044	C5orf30			CHN1
	gene1045				RRP15
	gene1046	C12orf73
	gene1047	ROBO2			KCNJ1
	gene1048	WNT16
	gene1049	NFIB			LARP7
	gene1050
	gene1051	SPATA16			TTC32
	gene1052	C4orf47			CDH18
	gene1053	HISPPD1
	gene1054	TMEM67			MSR1
	gene1055	PJA2
	gene1056	DOCK1			YTHDC1
	gene1057	SFRS2IP			CD302
	gene1058				PCMTD1
	gene1059	SNORD113-4
	gene1060	MLLT3			SNORD113-9
	gene1061	LIMCH1			CDK8
	gene1062				UBP1
	gene1063	DGKH			MYH8
	gene1064
	gene1065	PTP4A1			DNAH14
	gene1066	NDUFA5			DOCK1
	gene1067				KIAA1147
	gene1068	EPB41L2			GABRG3
	gene1069	ASAP1			SNORD114-7
	gene1070				KLB
	gene1071	HECTD1
	gene1072	YES1			ST6GALNAC5
	gene1073	EIF3M			DAZL
	gene1074	NDUFS4			C12orf73
	gene1075	JMJD1C			SHOC2
	gene1076	PLA2G16			PRTG
	gene1077	FGFR1OP2			STARD4
	gene1078	SELT			JKAMP
	gene1079				NEK7
	gene1080	ARID1B			CDK17
	gene1081	PTPN4			EPB41L2
	gene1082				SNORD113-4
	gene1083	SNORD113-6			SLC39A10
	gene1084	RUNX1T1			ZNF770
	gene1085	MBNL1			HDAC9
	gene1086	CSMD3			CTNNA3
	gene1087	SCN9A			MKLN1
	gene1088
	gene1089	ALB			SPATA5
	gene1090	DENND5B
	gene1091	ZBTB41			AKT3
	gene1092	XKR6
	gene1093	USP47			ODF3L2
	gene1094	STARD4
	gene1095				UNC5D
	gene1096				CPNE3
	gene1097
	gene1098	THUMPD2			DLG2
	gene1099				GABRA4
	gene1100	C3orf58			LPHN3
	gene1101	SLC25A26			SHQ1
	gene1102	CADPS2			SFRS2IP
	gene1103	WRN
	gene1104	PHTF1
	gene1105	ACER3
	gene1106	ROBO1			CHSY3
	gene1107	UTRN			RAD51L1
	gene1108	SETDB2			PROS1
	gene1109	PROS1			OR13A1
	gene1110				PPFIA2
	gene1111	MAP3K7			ARID4A
	gene1112				TTC8
	gene1113				AHCTF1
	gene1114	MIR103-1			HECTD1
	gene1115				AGBL3
	gene1116	MSRA
	gene1117	TANK			LIMCH1
	gene1118				HCN1
	gene1119	COL12A1			SNORA70B
	gene1120	LHX9			SNX13
	gene1121				CNTNAP4
	gene1122	ITGA6			SEMA3C
	gene1123	RAD54B			MAP4K3
	gene1124	PCDH15
	gene1125	MSR1
	gene1126				FGF7
	gene1127				ACBD6
	gene1128	SPEF2			SELT
	gene1129	CWC15			PPP1R12A
	gene1130	C21orf34
	gene1131	RAD51L1
	gene1132	LRRK2			FGFBP3
	gene1133	DPY19L1			SACS
	gene1134	C14orf129			LRRK2
	gene1135	JMJD1C
	gene1136	IRAK1BP1			KCTD4
	gene1137	DCAF6			PHF3
	gene1138				RSBN1L
	gene1139	ZFP91			ATP8B1
	gene1140	RGS22			NDUFA5
	gene1141	SNX13			SNORD113-6
	gene1142	TMPRSS11D			IRAK1BP1
	gene1143	NUDCD1			PHTF1
	gene1144	RAD51L1			RNF150
	gene1145				DGKH
	gene1146	OPA1			POT1
	gene1147	SSBP2
	gene1148	FAM98A			RNASE9
	gene1149	IFNA14			NCOA1
	gene1150	PARK2			ARAP2
	gene1151				COG6
	gene1152	ATAD1			OR51S1
	gene1153	TMEM62			UBL3
	gene1154	PPP1R12A			RANBP2
	gene1155	TCTN2			DPYD
	gene1156	PCCA
	gene1157	PRTG			CHN1
	gene1158	ACER3			MRPL13
	gene1159	RFX6			PCNX
	gene1160	CSTF3			CCDC7
	gene1161	ASXL2			GMFB
	gene1162				EPC2
	gene1163	COMMD8			RNF145
	gene1164	USP6NL
	gene1165
	gene1166				KIAA0895
	gene1167	MIR103-1			RUNDC3B
	gene1168				EML4
	gene1169	SLAIN2			RB1
	gene1170	NCOA1
	gene1171	PTP4A1			AQR
	gene1172	SHOC2			SLC10A7
	gene1173	ENOX1			MRE11A
	gene1174	MKLN1			ANTXR2
	gene1175	TDRD3			SEPT13
	gene1176	CLASP2			RNF138
	gene1177				EIF3M
	gene1178				PTPN4
	gene1179	SPAST			CADM2
	gene1180	CCDC91			SNORD114-28
	gene1181				PDHX
	gene1182	LMO7			ANKRD50
	gene1183	EPS8			TRIM33
	gene1184
	gene1185	SFRS18
	gene1186	CASD1			RBMS3
	gene1187	GLO1			GTF3C3
	gene1188
	gene1189	KCND2			LRRK2
	gene1190	RNF144A
	gene1191	FH			SLC25A21
	gene1192				SMR3B
	gene1193	PDGFC			LARP4B
	gene1194	PUM2			NUDCD1
	gene1195				POT1
	gene1196	AGBL3			COMMD8
	gene1197	AGPAT3			PBRM1
	gene1198	FLJ41562			MBNL1
	gene1199	MORN2			FLRT3
	gene1200	KCTD4
	gene1201				FBXW7
	gene1202	NR1D2			LRRC39
	gene1203	CTNNA3			MLLT3
	gene1204	PDE5A			PLA2G16
	gene1205				SNTG2
	gene1206				LPHN3
	gene1207	ZFR			CAB39L
	gene1208				ATP2B1
	gene1209	AP3B1			RAD51L1
	gene1210	FLJ40504			TET2
	gene1211	GALNT13			MIPEP
	gene1212	NR2C1			REEP3
	gene1213
	gene1214				F13B
	gene1215	DPY19L4			FRS2
	gene1216	NFXL1			GALNT7
	gene1217	NCOA1			PTPRQ
	gene1218				FAM190B
	gene1219	STT3B			B3GNT6
	gene1220	MED12L			CCDC91
	gene1221	KCTD3
	gene1222	SATB2			HNRPLL
	gene1223	TP63			FUT8
	gene1224	RTKN2			CDKAL1
	gene1225	TMED7-TICAM2			ELF1
	gene1226	LRP5			ABCA5
	gene1227	LPHN3
	gene1228	LRRIQ3			POT1
	gene1229	CCDC88A			OR6C76
	gene1230	RICTOR
	gene1231				TMPRSS11D
	gene1232	CCDC7
	gene1233	SETDB2			GNRHR
	gene1234	MIR1279			BAT2L2
	gene1235	GMFB			EZH2
	gene1236	SLC25A21			LRBA
	gene1237	VTA1			ZC3H13
	gene1238	SCRN3
	gene1239	OR13A1
	gene1240				RAB3GAP2
	gene1241	LRRC1
	gene1242	LRBA			CCDC88A
	gene1243	PXDNL
	gene1244	CYP1B1			CHL1
	gene1245	ARHGAP15			TAS2R14
	gene1246				GFM2
	gene1247
	gene1248				CFHR4
	gene1249	OR8H3			HIPK3
	gene1250	NTM			RFX6
	gene1251	ZEB1			RNF2
	gene1252	DSG3			PTP4A1
	gene1253	FAT1
	gene1254	SEMA3A			PMCH
	gene1255	EPS15			ASB5
	gene1256	CDKAL1
	gene1257	2023-03-01
	gene1258				SEMA3A
	gene1259	NRXN1
	gene1260	GPBP1			SGMS1
	gene1261	USH2A			KAAG1
	gene1262	C1orf9
	gene1263	TMEM232			VWDE
	gene1264	FAM13AOS
	gene1265	SNX13			TCTN2
	gene1266	DLEU1			C6orf41
	gene1267	SMEK2			C8orf22
	gene1268
	gene1269	NBAS			DHX15
	gene1270	LIPA			AHR
	gene1271	WDR72			RAD21
	gene1272	FAM162B
	gene1273	TET2			LMNB1
	gene1274	TMPRSS11F			SPATA7
	gene1275	PPP3CA
	gene1276	HIGD1A
	gene1277	FXR1			PLCE1
	gene1278	COBLL1			PTPRZ1
	gene1279	TRIP12
	gene1280	CDC42BPA			PICALM
	gene1281	GABRG3			IFNGR1
	gene1282				MAT2B
	gene1283	NETO1
	gene1284	SLC7A11			FLJ41562
	gene1285	ATP2C1			DCHS2
	gene1286	SPATA16			AP3B1
	gene1287	FGF7			NAV3
	gene1288	RNF182			EXOC6
	gene1289	ZRANB1			PCCA
	gene1290				SPDYA
	gene1291	GTF2A1			IMPA1
	gene1292				DNAJB6
	gene1293	TAS2R19
	gene1294	SNORD114-12			ABHD10
	gene1295	GTF2A1			CHCHD3
	gene1296	EFNA5			PXDNL
	gene1297	TBL1XR1			PCDH9
	gene1298				TMPRSS11B
	gene1299				DPY19L1
	gene1300	ARMC8			RBMS3
	gene1301	LHX9			OCLM
	gene1302	SACS			ABCE1
	gene1303	KIF21A			SFRS2B
	gene1304	METTL4
	gene1305	FBXW7			SPRED1
	gene1306	ALX1
	gene1307				VPS13B
	gene1308	SLC10A7
	gene1309	NAP1L1
	gene1310				PTPN12
	gene1311	NDST4			PBX3
	gene1312	IQUB			TAX1BP1
	gene1313	ZBBX			TDRD3
	gene1314	RAD21			ATAD2
	gene1315	TP63
	gene1316	WDR63			JMJD1C
	gene1317	PTPRQ			TMED7-TICAM2
	gene1318				SETDB2
	gene1319	TGFBR2			DIAPH3
	gene1320	PARN
	gene1321	GLRB
	gene1322	TACR1
	gene1323				TSPAN8
	gene1324	DLG2			BOLL
	gene1325	JMJD1C
	gene1326	TMPRSS11B			SECISBP2L
	gene1327				IBSP
	gene1328	USP53			ODZ3
	gene1329	UBE2E3
	gene1330
	gene1331	DNAH14			C4orf31
	gene1332	CRISP2			LIPA
	gene1333	PLA2G16			C4orf47
	gene1334				EPS15
	gene1335
	gene1336				MIR644
	gene1337	UBLCP1
	gene1338	GALNTL6			AP1AR
	gene1339	ZNF292			PHF3
	gene1340	IL15			HIGD1A
	gene1341	CHL1			TBC1D5
	gene1342				RORA
	gene1343	CDK17
	gene1344	PBK			SNORD114-4
	gene1345	DHX15			SNORD114-12
	gene1346	OR9Q1
	gene1347	SMR3B
	gene1348	MRE11A			ENKUR
	gene1349				LIMCH1
	gene1350				LMO4
	gene1351	SFRS2IP			PUM2
	gene1352	TTC27			TNFSF11
	gene1353	RSBN1L
	gene1354				SLCO1B3
	gene1355	ROBO1			DZIP1
	gene1356	ODZ3			SEC24B
	gene1357	RNASE9
	gene1358	DCLRE1A			ZFAND6
	gene1359	RORA
	gene1360	PAPOLA			BICD1
	gene1361				CDC42BPA
	gene1362	WASL
	gene1363	OR8H1			KTN1
	gene1364	CNTNAP4			QKI
	gene1365	C1GALT1
	gene1366	FGFBP3			TSPAN19
	gene1367	CSPP1			MYO10
	gene1368	SGCZ			NBAS
	gene1369	COG6			SEMA3A
	gene1370				TM9SF3
	gene1371	GNRHR			FBXL17
	gene1372				NCOA2
	gene1373	PHTF2
	gene1374	AQR			POT1
	gene1375	WASL			C8orf83
	gene1376				BAT2L2
	gene1377	DENND4A			KLRK1
	gene1378				PLCB4
	gene1379
	gene1380	JKAMP
	gene1381	FLRT3			2023-03-06
	gene1382
	gene1383	TTC32			KIAA0922
	gene1384	C8orf22			TAS2R20
	gene1385	IRAK1BP1			ATPBD4
	gene1386	SPATA5			CDC7
	gene1387				NRXN1
	gene1388	PRH1			RBM33
	gene1389				C5orf30
	gene1390				IGF2R
	gene1391	RNF2			DEPDC1
	gene1392	LIMCH1
	gene1393				TMEM62
	gene1394	OR10A6			MBNL1
	gene1395	NXPH2			ROBO2
	gene1396	CHN1			TSHB
	gene1397	DUSP12
	gene1398
	gene1399
	gene1400	AGL			TRPC1
	gene1401	AHR			TBL1XR1
	gene1402	SLC39A10			CD2AP
	gene1403	FBXL17			FGFR1OP2
	gene1404				KIAA0528
	gene1405				PPM1L
	gene1406	RNLS			DENND5B
	gene1407				SLIT2
	gene1408	ANKRD50			MTMR9
	gene1409	WDR19
	gene1410	HIST1H2BB			CWF19L2
	gene1411	ITGB6
	gene1412	PCNX			MMP16
	gene1413	MUDENG			OR8H1
	gene1414				ARHGEF12
	gene1415	GTF3C3			NXPH2
	gene1416				RUNDC3B
	gene1417	FAM190B
	gene1418	BDNF			CD36
	gene1419	DENND4C			EXOC2
	gene1420	PARD3
	gene1421	NET1
	gene1422	CTNNA3			ITGB6
	gene1423	CD2AP
	gene1424	EYS			EED
	gene1425	BRWD1			ZFYVE16
	gene1426	FAM19A5			FRS2
	gene1427	DIAPH3			AHI1
	gene1428	PRR16			WNT16
	gene1429	PLCB4			WDFY4
	gene1430	UBL3			ATP2B1
	gene1431				TRIO
	gene1432	BICD1			SERPINI2
	gene1433	AKT3
	gene1434	PPFIA2			MYCBP2
	gene1435				C13orf31
	gene1436	MON1B
	gene1437				ATAD1
	gene1438	PAN3			WASL
	gene1439	MIR644			CLDN1
	gene1440	CLINT1			KIAA1109
	gene1441				OPA1
	gene1442				LRP5
	gene1443	FGFBP3
	gene1444
	gene1445	METAP1			EFNA5
	gene1446
	gene1447	2023-03-06
	gene1448	HNRPLL			HACE1
	gene1449	ZNF506
	gene1450	SLC7A11			MIRLET7C
	gene1451				PCMTD1
	gene1452	SEMA3C			LOC150568
	gene1453	SLC30A1			KIAA0586
	gene1454	RICTOR
	gene1455	MYCBP2			P2RY14
	gene1456	SNORD114-4			LRRC1
	gene1457	LTBP1			MOBKL3
	gene1458	RIMS1			ZEB1
	gene1459
	gene1460	IL5			C12orf73
	gene1461	MIR1-2
	gene1462	DEPDC1			LIMCH1
	gene1463	HNF4G			HNF4G
	gene1464	HISPPD1			NAP1L1
	gene1465	CAV2			GTF2A1
	gene1466	LRRC39
	gene1467	SFRS18			EGLN1
	gene1468	CDH18			CDH10
	gene1469	SERPINI2			STXBP5
	gene1470
	gene1471	ARHGEF12			TRIP12
	gene1472	RAPGEF2			NCOR1
	gene1473				COBLL1
	gene1474	MYH8			LEKR1
	gene1475	ST8SIA4			BCL11B
	gene1476	LPHN3			MAP3K7IP2
	gene1477				ST6GALNAC3
	gene1478	FBXO4			SH3D19
	gene1479	NAV3			C1orf114
	gene1480
	gene1481	ZNF326			IMPA1
	gene1482	MOBKL3			MIB1
	gene1483				MUDENG
	gene1484	ZFYVE16			GDAP1
	gene1485				QKI
	gene1486	CSMD3			CCR8
	gene1487	ZNF664			STT3B
	gene1488	MAT2B			OSBPL9
	gene1489	ODZ3			EPB41L3
	gene1490	C10orf32			DPM1
	gene1491	RBM33			TMPRSS11F
	gene1492
	gene1493	ZMYM2			SCN9A
	gene1494	MAPK14			TGFBR2
	gene1495	PCCA			DSG3
	gene1496	ZNF451			ALX1
	gene1497	ASB5			MIR1-2
	gene1498	MPP7			PXDNL
	gene1499	CASP1			OPA1
	gene1500	ENKUR			PTP4A1
	gene1501	B3GALT2			C6orf167
	gene1502	ZNF330			OR1D2
	gene1503				LRRC1
	gene1504				RIMS2
	gene1505				RNF144A
	gene1506	AHI1			CRISP2
	gene1507	KIAA0528			GTF2A1
	gene1508	B3GALT2			GALNT13
	gene1509	GUCY1B3			ESR1
	gene1510	USP12			SCAPER
	gene1511				CCDC126
	gene1512	SNORD114-7			LACE1
	gene1513	RUNDC3B			XPR1
	gene1514
	gene1515				SOX5
	gene1516	RNF138			INO80D
	gene1517	EZH2			SP4
	gene1518	GALNT7			C6orf10
	gene1519	REEP3			SPATA16
	gene1520	ELMOD2			SLC7A11
	gene1521
	gene1522	CSMD3			LOC340017
	gene1523	TBC1D5			IKZF3
	gene1524	DEPDC1B			SFRS2IP
	gene1525	STXBP5
	gene1526	RB1			HTN3
	gene1527	SPDYA			KIDINS220
	gene1528	CFTR			LIN28B
	gene1529
	gene1530	ARID4B			FBXL4
	gene1531	LOC150568			THUMPD2
	gene1532	PPM1A
	gene1533				ZRANB1
	gene1534				PAPOLA
	gene1535	PPM1L			CD36
	gene1536				N4BP2
	gene1537	SECISBP2L			MIR302D
	gene1538	IKZF2			EXOC5
	gene1539	KIAA0586			CASP1
	gene1540	CHN1			C12orf73
	gene1541	ITGB1			BDP1
	gene1542	SPATA7			CDADC1
	gene1543	MUSK			HNMT
	gene1544
	gene1545				G2E3
	gene1546	AKAP10
	gene1547	OR13A1			ZNF664
	gene1548				NEK7
	gene1549	EIF2AK2			OR10A6
	gene1550	DYRK2
	gene1551	ZC3H13			ICA1L
	gene1552	TNIK			OR5K3
	gene1553	ATP6V1B2			ARID1B
	gene1554	GUCY1A2			TNPO1
	gene1555	FAM38B			FAM184A
	gene1556	DIS3			ZNF608
	gene1557				LOC401387
	gene1558	PDHX
	gene1559	ARAP2			ST8SIA4
	gene1560
	gene1561	ANKRD12			METAP1
	gene1562	ZNF770			LTBP1
	gene1563	C2orf67
	gene1564	LOC100129716			CASD1
	gene1565	MTMR7			MIPEP
	gene1566				GLO1
	gene1567	SH3GLB1			MKLN1
	gene1568	LACE1			IL5
	gene1569	NRG1			CSMD3
	gene1570	BMI1			EPS8
	gene1571	TRIO			EFR3A
	gene1572				IMPACT
	gene1573	SEMA3C
	gene1574	SEC24B			C12orf48
	gene1575	DYNC1I2			ZNF800
	gene1576	DCC
	gene1577	BAT2L2			WDR72
	gene1578				ZMYM2
	gene1579	FAM176A			ACSS3
	gene1580	RAB3GAP2
	gene1581	C14orf138			CSMD3
	gene1582	MGAT4C			MPP7
	gene1583	BAT2L2			NFIB
	gene1584	RBMS3			EIF3E
	gene1585	SFRS2B			NRG3
	gene1586	GOPC			NAALADL2
	gene1587	SGMS1			NLK
	gene1588				BDNF
	gene1589	HECW1			HAUS3
	gene1590	CD36
	gene1591	HDAC4			KDM1A
	gene1592
	gene1593	MMP16			PHACTR2
	gene1594	SNTG1			EIF2AK2
	gene1595	FRS2
	gene1596	PCDH9
	gene1597	CFH			SLC35D1
	gene1598	G2E3			SEC61G
	gene1599	SEMA3A			CYP1B1
	gene1600	CDH10
	gene1601	TTC33			ZNF451
	gene1602	SNORD113-6			CCDC54
	gene1603	KTN1			ZRANB1
	gene1604	ZNF451			PTPRD
	gene1605	XPR1			TMEM30A
	gene1606	KIAA0895
	gene1607	PHF3			PRR16
	gene1608	B3GNT6			ZHX1
	gene1609	OR2W1			C3orf16
	gene1610	ABCE1
	gene1611	PCDH9			RFPL3S
	gene1612	PLDN
	gene1613	CDK8			AKT3
	gene1614	LIN28B			IRAK1BP1
	gene1615	POT1
	gene1616				OR2A2
	gene1617				ENOX1
	gene1618				LRRIQ3
	gene1619				CSPP1
	gene1620	ZC3H13			CCDC59
	gene1621	SNORD114-28			ARHGAP26
	gene1622	VPS54			KLHL1
	gene1623	HERC6			WAC
	gene1624	MLL5			VAPA
	gene1625	NSMCE1			ASNSD1
	gene1626				MLL5
	gene1627				WDR35
	gene1628	KERA			ROBO1
	gene1629	GNAQ
	gene1630	FLJ10213			OR6C75
	gene1631	MIRLET7C			FAT4
	gene1632
	gene1633	RNF145			CSNK1A1
	gene1634	DNAJB9			2023-03-08
	gene1635	KLRK1			TCF12
	gene1636	WEE1			MTMR15
	gene1637	C4orf31			OR2W1
	gene1638	CDON
	gene1639	RUNX1T1			MOBP
	gene1640				PACRGL
	gene1641	EPS15
	gene1642	TRIM61			DCAF6
	gene1643	ZZZ3			NF1
	gene1644	BOLL			PRR4
	gene1645	LOC202181			KIAA1712
	gene1646	RXRA			GRIN2A
	gene1647	F13B			LCORL
	gene1648	OR6C75
	gene1649	ACBD6			GULP1
	gene1650	SELT			MAP9
	gene1651	C1orf114			PARD3
	gene1652	OR14A16
	gene1653	USP33
	gene1654	SUB1
	gene1655	NEK7
	gene1656	TSPAN8			LOC649395
	gene1657				RAB3C
	gene1658	SYNE1			RTN4
	gene1659				MIR599
	gene1660	BTAF1			HNRNPH3
	gene1661	ANKRD10			PPM1A
	gene1662	SLCO1B3			RAB18
	gene1663				ZBBX
	gene1664
	gene1665	HBS1L			MSRA
	gene1666	GRID2
	gene1667				ZNF451
	gene1668	CGGBP1
	gene1669	NOX4			XPR1
	gene1670	EXOC6
	gene1671	MGAT4C			NCOA1
	gene1672	EIF5A2			MGAT4C
	gene1673	OR51S1			TTC27
	gene1674	TMED5			SATB2
	gene1675	TDRD3			NETO1
	gene1676	MAP4K3
	gene1677	TXNDC3			FGFBP3
	gene1678	SELENBP1
	gene1679	CASC4
	gene1680	HTN3
	gene1681	CD2AP			MIR30B
	gene1682	ACSS3			UBL3
	gene1683	PDZRN4			ATF6
	gene1684	DZIP1			NSMCE2
	gene1685	CISD1			ZFYVE9
	gene1686				MED13
	gene1687	BCHE			LARP7
	gene1688	CNTNAP4
	gene1689	THOC4			NSMCE1
	gene1690				ACCN5
	gene1691	CTR9
	gene1692	ZNF675			PIKFYVE
	gene1693				COMMD3
	gene1694	CYB5R4			FBXO4
	gene1695
	gene1696	RAB32			DUSP19
	gene1697	SLC6A16
	gene1698	KIDINS220
	gene1699	DKK2			SGCZ
	gene1700	RNLS			MAP4K5
	gene1701
	gene1702	SFRS18			CSMD3
	gene1703	RBMS3			GATAD2A
	gene1704	SATB1			VPS4B
	gene1705	SYT14
	gene1706				SCHIP1
	gene1707	VPS13B			GRM8
	gene1708	NRCAM			ZNF286B
	gene1709	DIAPH3			MGAT4C
	gene1710	ERBB4			MAS1L
	gene1711	SP4			C5orf28
	gene1712	LYST			EP400
	gene1713	KRTAP4-4			OR8H1
	gene1714				AKT3
	gene1715				ITGB1
	gene1716	ZNF404
	gene1717	ARHGAP26			KLK13
	gene1718				CADPS2
	gene1719	USP47
	gene1720	PRKG1			DNAJB9
	gene1721	DPYD			MAP3K7
	gene1722	PXDN			SLC6A16
	gene1723	LOC401387			PJA2
	gene1724	PDE4D
	gene1725	PHF3
	gene1726				USP12
	gene1727	SNORD53			ZWILCH
	gene1728	CFH			VEZT
	gene1729	RNF144A			RALGPS2
	gene1730
	gene1731	LOC651250			TMPRSS11B
	gene1732	MMP13			CDH18
	gene1733	CHCHD3			ACVR2A
	gene1734	ICA1L
	gene1735				KERA
	gene1736	FUT8			ZHX1
	gene1737				ATP6V1G3
	gene1738	HTR1F
	gene1739	EXOC4			OR2L1P
	gene1740	KIAA0528
	gene1741	C1orf173			C6orf173
	gene1742	EFR3A			INTS6
	gene1743	GRIN2A			RNGTT
	gene1744	ST6GALNAC5			MEP1A
	gene1745	CDC42BPA			RUNX1T1
	gene1746
	gene1747	DDX4			HECA
	gene1748	ZNF800			DYNC2H1
	gene1749	C12orf48			ALB
	gene1750
	gene1751				NCEH1
	gene1752				IKZF2
	gene1753				OSBPL1A
	gene1754	LAX1
	gene1755	RNF6			CISD1
	gene1756	COL4A3BP			GUCY1B3
	gene1757
	gene1758	TAX1BP1			FXR1
	gene1759	GRM3
	gene1760	2023-03-01			TFEC
	gene1761	C11orf30			ANKRD30A
	gene1762	PIBF1			SLC30A1
	gene1763	PBRM1
	gene1764	ASH1L
	gene1765	CHRM2			ANKRD10
	gene1766	VAPA			SLC25A46
	gene1767	HNRPLL			PRG4
	gene1768	MED13L			USP33
	gene1769	ELF1			EYS
	gene1770	CNTN6
	gene1771	ULK4			DDX4
	gene1772	OR1D2
	gene1773	KLHL28			PPP1R2P1
	gene1774	CHD2			PPP1R2P1
	gene1775	TMEM87A			LOC100216001
	gene1776	MAP3K7IP2			MEP1A
	gene1777	ZNF804B
	gene1778	OSBPL9			WWC2
	gene1779
	gene1780	PPP1R14B
	gene1781				REV3L
	gene1782	C5orf35			GOPC
	gene1783	MUM1			MIPOL1
	gene1784	PICALM			LRRN3
	gene1785	TFEC			TBP
	gene1786
	gene1787				YES1
	gene1788	FBXL17			ZNF770
	gene1789				ZNF107
	gene1790	EPS8			PLDN
	gene1791
	gene1792	KIAA0922
	gene1793	PIK3CG
	gene1794				RPA3
	gene1795	CHIC2			PER4
	gene1796	PIKFYVE			PHTF2
	gene1797	SFRS11			BCHE
	gene1798
	gene1799	CNTN5			MED13L
	gene1800				EXOC4
	gene1801	ABCA13			ZFC3H1
	gene1802				USH2A
	gene1803
	gene1804	IBSP			DNAJC1
	gene1805	NUP133			POLI
	gene1806	POT1			PTPRC
	gene1807	C13orf31
	gene1808	GFM2			PLA2G16
	gene1809	MIPEP			MARS2
	gene1810	EPB41L3			POLK
	gene1811	TRIP12
	gene1812	GDAP1			RMI1
	gene1813	KLHL7			TGFBR3
	gene1814				WDSUB1
	gene1815	ATP6V1G3			COMMD1
	gene1816	MIPOL1
	gene1817	GPR158
	gene1818	NUPR1
	gene1819	KIAA1712			LOC728190
	gene1820				ZNF404
	gene1821
	gene1822	LRRC1			ZZZ3
	gene1823				FAM184A
	gene1824				DCUN1D4
	gene1825				OR9Q1
	gene1826	RTN4			SFRS12IP1
	gene1827	XPO4
	gene1828	XPR1			XPO4
	gene1829				BMI1
	gene1830	ATF6			SF3B1
	gene1831	NAALADL2			KIAA1430
	gene1832	SLC25A46
	gene1833	SPAM1			COL5A2
	gene1834				CDON
	gene1835				MIR143
	gene1836	MIR550-2			LPHN3
	gene1837	SNORD113-9
	gene1838	RAB40B			STXBP5
	gene1839	NEK7
	gene1840				C15orf41
	gene1841	SCHIP1			CNTN5
	gene1842				SLC17A6
	gene1843	ZRANB1			NUP133
	gene1844				METT5D1
	gene1845	ZEB1			RICS
	gene1846	NAV3			NFIB
	gene1847	ATXN10			MAN2A1
	gene1848	C1GALT1			ST7L
	gene1849	EED			COL12A1
	gene1850				TMEFF2
	gene1851	LPHN3			MIR1974
	gene1852				THAP2
	gene1853	CCDC59			ZBTB41
	gene1854	SNORD113-4			DYRK1A
	gene1855	LMNB1
	gene1856	MIR302D			RAD54B
	gene1857
	gene1858	AKT3			ZNF804B
	gene1859				PARP8
	gene1860	MNAT1			RUFY3
	gene1861	ADAM17			ZSWIM6
	gene1862	TTC8			FYTTD1
	gene1863	CADM2			SMURF2
	gene1864	ATP2B1
	gene1865
	gene1866	ATP2B1			CSNK1A1
	gene1867	NSMCE2			GRM1
	gene1868				DCC
	gene1869	ZNF800
	gene1870	IRAK1BP1			SFRS13B
	gene1871	PTPRZ1
	gene1872				FAM98A
	gene1873				RAP1A
	gene1874	COX6A1			FILIP1
	gene1875				CLCN3
	gene1876	GRIN2A			KLHL7
	gene1877	RBPJ
	gene1878	MYL1
	gene1879	LOC649395			HECW1
	gene1880				COPS8
	gene1881	HNRNPH3			SNCAIP
	gene1882	H3F3B			PPM1A
	gene1883				KIAA1033
	gene1884	GMPS			SEMA3E
	gene1885	SNORD56B			PCDH9
	gene1886	OR2A2			SPAST
	gene1887				SNORD113-4
	gene1888	DENND4A			TMED5
	gene1889				DENND4A
	gene1890	TBP			KIAA1468
	gene1891	LIMCH1			FAT4
	gene1892	FAM184A			PHF3
	gene1893	OR51V1			ERGIC2
	gene1894	SVIP
	gene1895	HACE1			DOCK9
	gene1896				FOXN2
	gene1897	PLCE1
	gene1898	RUFY4			A2M
	gene1899	DOCK4			CNBD1
	gene1900	CADM2			TUBGCP3
	gene1901	LARP7			PRDM2
	gene1902	CHRM2			NAP1L1
	gene1903	NRG3			SKAP2
	gene1904				GUCY1A2
	gene1905
	gene1906	ALB			AKAP10
	gene1907				SFRS18
	gene1908				NEBL
	gene1909	PARP8			RAPGEF6
	gene1910	TMEM30A			SFRS2IP
	gene1911	MDGA2			GPR158
	gene1912	PHACTR2			CACNA2D1
	gene1913	OCLM			HCFC2
	gene1914	TRIM33			OSTC
	gene1915	SEMA3E			OR5I1
	gene1916				RAD54B
	gene1917
	gene1918
	gene1919	COL5A2			BTAF1
	gene1920				PGM2L1
	gene1921	LOC255025			TRIP12
	gene1922	KCTD6
	gene1923	MIR599			CSMD3
	gene1924	MGAT4C			UBE3C
	gene1925	PIK3C2G
	gene1926	FYTTD1			TUSC3
	gene1927
	gene1928	ZNF85			CWC15
	gene1929	LPHN3			SNORD56B
	gene1930	KERA			NAV3
	gene1931	RAP1B			FIP1L1
	gene1932	SEC61G
	gene1933	IFNGR1			REV1
	gene1934	RANBP2			FBXO34
	gene1935				C21orf34
	gene1936	LARP7			KCTD5
	gene1937	CACNA1E
	gene1938	LOC493754			ZNF714
	gene1939				CSMD3
	gene1940	STXBP5			MED13L
	gene1941	C8orf83			CFTR
	gene1942				IRAK1BP1
	gene1943	BCAS3			RNF160
	gene1944	SCHIP1
	gene1945	TSHB
	gene1946	NAA25			SOX6
	gene1947	LCORL			DYRK1A
	gene1948				GMPS
	gene1949	STK38L
	gene1950	RUNDC3B			USPL1
	gene1951	DCP1B			KCNJ3
	gene1952
	gene1953	RBMS1
	gene1954	ATAD2			TM9SF3
	gene1955	SKINTL			CADM2
	gene1956	SCN9A			ZMYM6
	gene1957	PGAP2			RTKN2
	gene1958	DYRK1A			C1orf103
	gene1959	ATAD1			SLC30A8
	gene1960	NCOA1			MYCBP2
	gene1961	EPS15			SPATA5
	gene1962				SUGT1L1
	gene1963	PDE10A
	gene1964	ERGIC2
	gene1965				R3HDM1
	gene1966	RNGTT			FTSJD1
	gene1967	RICS			EFR3A
	gene1968				PPP1R14B
	gene1969	EGLN1			FAM176A
	gene1970	SFRS2B			EPS15
	gene1971
	gene1972	FOXN2			ATM
	gene1973	OR2B2			NET1
	gene1974				LYST
	gene1975	CEP350
	gene1976				C8orf59
	gene1977	LRFN5			OR1D2
	gene1978	CUBN
	gene1979	PTPN12
	gene1980	PTPRD
	gene1981	FAM126A			SLC26A4
	gene1982	EXOC5			NCOA1
	gene1983	NAP1L1
	gene1984	LRRK2			SR140
	gene1985	NEUROD6			PLA2G16
	gene1986	COMMD1
	gene1987
	gene1988	MAS1L
	gene1989	INO80D			FYTTD1
	gene1990				ARID2
	gene1991				LPHN3
	gene1992	THAP5			RUFY4
	gene1993	LRRN3			FAM174A
	gene1994
	gene1995	CXADR			ASPM
	gene1996				GRM3
	gene1997	VEZT			CHCHD3
	gene1998	C6orf103			PDZRN4
	gene1999	NCEH1			OR51S1
[truncated: 2,056 more rows]

## Sheet: after GC correction
		Hannum	Horvath	Horvath2	Levine
	gene1	ANKLE2	ANKLE2	ANKLE2	ANKLE2
	gene2	SSH2	SSH2	SSH2	SSH2
	gene3
	gene4	TNFRSF21	TNFRSF21	CDC42BPB	TNFRSF21
	gene5	CDC42BPB	CDC42BPB	TNFRSF21	CDC42BPB
	gene6	ADAMTS9	ADAMTS9	LOC100130581	LOC100130581
	gene7	LOC100130581	LOC100130581	ADAMTS9	ADAMTS9
	gene8	ARID5A	CLEC14A	ARID5A	ARID5A
	gene9	PTPRN	ARID5A	PTPRN	PTPRN
	gene10	ELAVL3	PTPRN	JAG2	ELAVL3
	gene11	CLEC14A	ELAVL3	ELAVL3	JAG2
	gene12	JAG2	JAG2	CLEC14A	RNLS
	gene13	GALNT3		IL17RD	GALNT3
	gene14			KDM5A	USP53
	gene15	USP53		SRGAP3	CLEC14A
	gene16	RNLS		GALNT3
	gene17	MMADHC		USP53
	gene18	KDM5A		MYH9	IL17RD
	gene19	SRGAP3		RNLS
	gene20	LRBA			LRBA
	gene21
	gene22			MMADHC	MMADHC
	gene23			LRBA
	gene24				ATF2
	gene25	IL17RD
	gene26			KCTD18	SNORD114-31
	gene27	SNORD114-31
	gene28
	gene29			CEP97	FNBP1L
	gene30				PRKAG2
	gene31
	gene32			HDAC4
	gene33				PDE4B
	gene34	PDE4B		PDE4B	KDM5A
	gene35	CEP97		FBXO31	KIF20B
	gene36	MYH9		LENG8	CDH19
	gene37	LENG8
	gene38	ATF2			SRGAP3
	gene39	PRKAG2			CDH9
	gene40	PTPRZ1			HAUS3
	gene41	FNBP1L			UBE2E1
	gene42	SFRS12
	gene43	RASA1
	gene44	TMPRSS11F			CEP97
	gene45				SNORD114-25
	gene46				TMPRSS11F
	gene47	KIF20B			DCLRE1A
	gene48	CDH19
	gene49	UBE2E1			ARL13B
	gene50	HERC6			CSNK1G3
	gene51	KCTD18			PCDH9
	gene52				SNORD114-23
	gene53				HERC6
	gene54				MYH9
	gene55				MNAT1
	gene56				POU1F1
	gene57
	gene58				TSPAN19
	gene59
	gene60				SNORD114-23
	gene61
	gene62				MAS1L
	gene63
	gene64
	gene65
	gene66				SLC4A4
	gene67
	gene68
	gene69				NAALADL2
	gene70				SNORD114-25
	gene71				NEXN
	gene72
	gene73
	gene74				SP4
	gene75
	gene76				SNORD114-13
	gene77				PLOD2
	gene78				CSMD3
	gene79				INTS6
	gene80				ERC1
	gene81
	gene82
	gene83				ADAMTS19
	gene84				NMD3
	gene85				MYEF2
	gene86				OR8U1
	gene87
	gene88
	gene89
	gene90				SNORD114-31
	gene91				SNORD114-23
	gene92				FBXO31
	gene93				CSMD3
	gene94
	gene95				ERBB2IP
	gene96				CADM2
	gene97
	gene98				C14orf23
	gene99				SNORD114-26
	gene100				LAMA2
	gene101				PLA2G4A
	gene102				CDH19
	gene103				IQCF3
	gene104				PCDH9
	gene105				C4orf43
	gene106
	gene107				UGT2A1
	gene108
	gene109				PTPRZ1
	gene110				KCTD8
	gene111				GSTCD
	gene112				KCTD18
	gene113				ZDHHC20
	gene114				EYA4
	gene115				SNORD114-14
	gene116				KIF21A
	gene117				SNORD114-25
	gene118				ELMOD2
	gene119
	gene120				FIP1L1
	gene121
	gene122				RAD51AP2
	gene123
	gene124
	gene125				KRR1
	gene126
	gene127				RASA1
	gene128
	gene129
	gene130				SFRS12
	gene131				EXOC2
	gene132				TSPAN19
	gene133				GULP1
	gene134
	gene135
	gene136
	gene137				UBR3
	gene138				DMP1
	gene139
	gene140				ADK
	gene141				SERPINI2
	gene142
	gene143				ANK2
	gene144				PCLO
	gene145				GPATCH2
	gene146
	gene147
	gene148				GYS2
	gene149
	gene150				CNR1
	gene151				BZW2
	gene152				SNRNP48
	gene153
	gene154
	gene155				COX10
	gene156
	gene157
	gene158				PRPF40A
	gene159
	gene160				WWP1
	gene161				SLC26A7
	gene162				NDC80
	gene163				COG5
	gene164
	gene165				FMO9P
	gene166				DNM3
	gene167				CDC14A
	gene168
	gene169
	gene170
	gene171				RNGTT
	gene172				ZNF800
	gene173				NEDD1
	gene174
	gene175				DDR2
	gene176
	gene177				ZNF624
	gene178				ENPP4
	gene179
	gene180
	gene181				SNORD114-4
	gene182				SLC16A7
	gene183				IMPA1
	gene184				FGB
	gene185				TANK
	gene186
	gene187				ZSCAN23
	gene188				ZNF238
	gene189				CDC73
	gene190				EBAG9
	gene191
	gene192				BIRC6
	gene193				AASDHPPT
	gene194
	gene195				FBXL5
	gene196				NSUN3
	gene197				BBS9
	gene198				MBNL2
	gene199
	gene200				UBE2E3
	gene201				RBM20
	gene202				CDKAL1
	gene203
	gene204				SLC6A15
	gene205				SLC10A7
	gene206
	gene207				GULP1
	gene208
	gene209				OR14A16
	gene210				INPP4B
	gene211				EPB41L3
	gene212				RIMS2
	gene213				RRH
	gene214
	gene215				LCLAT1
	gene216
	gene217				LOC646762
	gene218				MYBL1
	gene219				POU1F1
	gene220				CCDC82
	gene221
	gene222
	gene223				HSPA13
	gene224				CSRNP3
	gene225				ZFHX4
	gene226				C17orf69
	gene227				SEMA3A
	gene228				DST
	gene229				C8orf79
	gene230				SCHIP1
	gene231				HISPPD1
	gene232
	gene233				PTPRC
	gene234				IL22
	gene235
	gene236				DUSP27
	gene237
	gene238				CACNA2D1
	gene239
	gene240
	gene241				IL1RL1
	gene242				SCN9A
	gene243
	gene244				TNPO1
	gene245				SPATA6
	gene246				CXXC4
	gene247
	gene248
	gene249				HOOK1
	gene250				SPRED1
	gene251				CTNNA3
	gene252				FOXO3
	gene253
	gene254				CASP4
	gene255				EPHA3
	gene256				SATB1
	gene257				STRN3
	gene258				PPP1R12A
	gene259
	gene260				LRBA
	gene261
	gene262				SNORD114-31
	gene263
	gene264				MIR103-1
	gene265				EPHA6
	gene266				LIN28B
	gene267				SNORD114-9
	gene268				JMJD1C
	gene269				SNORD113-2
	gene270
	gene271				LYPLAL1
	gene272				DTWD2
	gene273				PTPRQ
	gene274				PRR16
	gene275				PCDH17
	gene276				NRXN1
	gene277				SNORD114-11
	gene278				SHOC2
	gene279				SNORD114-27
	gene280				DTHD1
	gene281				YIPF7
	gene282				MGA
	gene283				CNGA1
	gene284				USP47
	gene285				HLTF
	gene286				SYT14L
	gene287				ARL13B
	gene288
	gene289
	gene290				SNORD114-8
	gene291				SLC4A4
	gene292				LIN7C
	gene293
	gene294				ITFG1
	gene295				FAM155A
	gene296				CAPS2
	gene297				CADM2
	gene298				TMED7-TICAM2
	gene299				SEC61G
	gene300				OR10A6
	gene301				SNORD113-2
	gene302				NDUFAF4
	gene303				FEM1C
	gene304				LOC145474
	gene305
	gene306				EHBP1
	gene307				TSPAN8
	gene308				PDE11A
	gene309				GTDC1
	gene310				VWC2L
	gene311				RIMS1
	gene312				ASXL2
	gene313
	gene314				ANTXR2
	gene315
	gene316				RIMS2
	gene317				CLASP2
	gene318
	gene319				STRN3
	gene320				NAV3
	gene321
	gene322				SLC16A7
	gene323				NLK
	gene324				PHF3
	gene325				CDH19
	gene326				HIPK3
	gene327				STOML3
	gene328				PEX3
	gene329
	gene330				FRMD6
	gene331				ACVR1C
	gene332				SYT1
	gene333
	gene334
	gene335				TTLL7
	gene336
	gene337				GPHN
	gene338				HISPPD1
	gene339				EFR3A
	gene340				PIAS1
	gene341
	gene342				PPP3CA
	gene343				MTMR9
	gene344				RDX
	gene345				NFYB
	gene346				REPS1
	gene347				ATP2B1
	gene348				PLCZ1
	gene349				OSTN
	gene350
	gene351				PTBP2
	gene352				BET1
	gene353				PPP3CA
	gene354				ARGLU1
	gene355				KIAA1383
	gene356				ADAMTS6
	gene357				CSMD3
	gene358				KLRA1
	gene359				PIK3C2G
	gene360				PPP3CA
	gene361				WRN
	gene362				DEFB114
	gene363				HERC4
	gene364				NEK7
	gene365				TTC35
	gene366				EPHA6
	gene367
	gene368
	gene369				EHBP1
	gene370
	gene371				MIR548B
	gene372				IFNA13
	gene373				TCF12
	gene374				CNOT2
	gene375				ZNF211
	gene376				DDX4
	gene377				COBLL1
	gene378				SNORD114-22
	gene379				ING1
	gene380				CTNNA3
	gene381				EIF3H
	gene382				CEP97
	gene383				AGR3
	gene384				PMS1
	gene385				PLEKHA5
	gene386				VRK1
	gene387				USP25
	gene388				ARID1B
	gene389
	gene390
	gene391				DTHD1
	gene392				FAM98A
	gene393				ELP4
	gene394				ZMYM2
	gene395
	gene396				FUBP1
	gene397				SNORD109B
	gene398				GPR18
	gene399				MIR30D
	gene400				SNORD114-13
	gene401				CLCN3
	gene402				SERPINI2
	gene403				TWF1
	gene404				ARHGEF12
	gene405				ZNF493
	gene406
	gene407				LENG8
	gene408				POLI
	gene409				MAP3K7IP2
	gene410
	gene411
	gene412				KRT24
	gene413				SNORD114-23
	gene414				C5orf47
	gene415				HTN1
	gene416				GRID2
	gene417				GULP1
	gene418				ENPP4
	gene419				LAMA2
	gene420				ROD1
	gene421				MRPS9
	gene422
	gene423				OXR1
	gene424				SOX5
	gene425				LRFN5
	gene426				SOX5
	gene427
	gene428				LCORL
	gene429				TANC2
	gene430				LIN28B
	gene431				ANKS1B
	gene432				ROBO2
	gene433				GUF1
	gene434				SLC35B3
	gene435
	gene436				TNPO1
	gene437
	gene438				CENPP
	gene439				C5orf43
	gene440
	gene441				GMDS
	gene442
	gene443				EIF4A1
	gene444				NBEAL1
	gene445				ANKRD17
	gene446				VTA1
	gene447				FAM190A
	gene448				DIAPH3
	gene449				NIPBL
	gene450				TMEM68
	gene451				C14orf149
	gene452				MAP9
	gene453				SC4MOL
	gene454				FAM172A
	gene455				EFR3A
	gene456
	gene457				GRB14
	gene458				MIR1279
	gene459				STEAP2
	gene460
	gene461
	gene462				OTUD6B
	gene463				FAM135A
	gene464
	gene465				SSFA2
	gene466
	gene467				SLC30A9
	gene468				ADAM2
	gene469				UST
	gene470				ATF7IP
	gene471				ZMYM2
	gene472				PTP4A1
	gene473				BLZF1
	gene474				EPS8
	gene475				MIR592
	gene476				ROBO1
	gene477				ME1
	gene478				TNRC6A
	gene479				TAS2R14
	gene480
	gene481				CAPS2
	gene482				ZCWPW2
	gene483				ZNF236
	gene484				NFIA
	gene485
	gene486				FLJ25363
	gene487
	gene488				SEH1L
	gene489
	gene490				TMEM64
	gene491
	gene492				DIAPH3
	gene493				SSFA2
	gene494				TTLL7
	gene495				EGLN1
	gene496				LOC100216001
	gene497				LCOR
	gene498				FAM190A
	gene499				COL8A1
	gene500
	gene501				MIR489
	gene502				PEG10
	gene503				FAM190B
	gene504
	gene505
	gene506				CASP4
	gene507				KATNAL1
	gene508
	gene509				MAN1A2
	gene510				SNORD109B
	gene511
	gene512				SNORD114-29
	gene513				SEMA3A
	gene514
	gene515
	gene516
	gene517				CEP97
	gene518
	gene519				EYS
	gene520				C5orf36
	gene521				CSN1S1
	gene522				RNF103
	gene523				STIM2
	gene524				OSBPL8
	gene525				GAS2
	gene526				CSN3
	gene527				CAPN7
	gene528				PIK3C2G
	gene529				PLEKHF2
	gene530
	gene531				PROS1
	gene532				NRXN3
	gene533				SMC3
	gene534				DICER1
	gene535				LOC441204
	gene536				PCDH9
	gene537				MTMR9
	gene538				PHF21A
	gene539
	gene540				XRCC4
	gene541				ABCB1
	gene542
	gene543				LOC441208
	gene544				HNRNPR
	gene545
	gene546				PHTF2
	gene547				SP4
	gene548				RBM12B
	gene549
	gene550				TAP2
	gene551				LAMA4
	gene552				TCHHL1
	gene553				SCG2
	gene554				OR13A1
	gene555
	gene556				MYO16
	gene557				MIR548H3
	gene558				OPRL1
	gene559
	gene560				INTU
	gene561				TMEM232
	gene562				UBE3A
	gene563				PMS1
	gene564				CDKL2
